# Supplementary material
Source: publisher figshare collection journal article supplement (https://plos.figshare.com/articles/dataset/_/662335)
Supplement: Supplementary file 1 [file 1 › Table_S2.docx]

**Table S2**: Plasmids present in *Pcal* strains.

|  | **Strains** | | | | | |
| --- | --- | --- | --- | --- | --- | --- |
| **Plasmids** | **ES4326** | **PSa1_3** | **PSa866** | **T3C** | **BS91** | **BS0968** |
| *pES4326A* | + | + | + | + | + | + |
| *pES4326B* | + | + | + | + | + | + |
| *pES4326C* | + | - | - | - | - | + |
| *pES4326D* | + | - | - | - | - | - |
| *pES4326E* | + | - | - | - | - | - |
