# Supplementary material
Source: publisher figshare collection journal article supplement (https://plos.figshare.com/articles/dataset/_/662335)
Supplement: Supplementary file 1 [file 1 › Table_S3.xlsx]

## Sheet: Sheet1
Supplementary Table S3: Genomes used for the phylogenetic tree shown in Figure 2 and for the comparison of protein repertoires that can be queried at http://pacu.facom.ufms.br/Pcal/
strain name	closed/draft	accession number or website, where genomes can be quieried by BLAST
Pseudomonas cannabina pv. alisalensis BS91	draft	http://img.jgi.doe.gov/cgi-bin/w/main.cgi?section=TaxonDetail&page=taxonDetail&taxon_oid=2516653056
Pseudomonas cannabina pv. alisalensis ES4326	draft	AEAK01000000
Pseudomonas cannabina pv. alisalensis PSa1_3	draft	http://img.jgi.doe.gov/cgi-bin/w/main.cgi?section=TaxonDetail&page=taxonDetail&taxon_oid=2512564082
Pseudomonas cannabina pv. alisalensis Psa866	draft	http://img.jgi.doe.gov/cgi-bin/w/main.cgi?section=TaxonDetail&page=taxonDetail&taxon_oid=2512564081
Pseudomonas cannabina pv. alisalensis T3C	draft	http://img.jgi.doe.gov/cgi-bin/w/main.cgi?section=TaxonDetail&page=taxonDetail&taxon_oid=2516653057
Pseudomonas fluorescens Pf0-1	closed	CP000094
Pseudomonas fluorescens Pf5	closed	CP000076
Pseudomonas savastanoi pv. savastanoi NCPPB 3335	draft	NZ_ADMI00000000.1
Pseudomonas syringae 642	draft	NZ_ADGB00000000
Pseudomonas syringae Cit 7	draft	AEAJ00000000
Pseudomonas syringae pv. aceris MAFF 302273 PT	draft	AEAO00000000
Pseudomonas syringae pv. actinidiae CFBP7286	draft	AGNO00000000
Pseudomonas syringae pv. actinidiae M302091	draft	AEAL01000000
Pseudomonas syringae pv. aesculi 2250	draft	NZ_ACXT00000000
Pseudomonas syringae pv. aesculi NCPPB 3681**	draft	ACXS00000000
Pseudomonas syringae pv. antirrhini 126	draft	http://genome.ppws.vt.edu/blast/blast.html (not yet submitted and no accession number)
Pseudomonas syringae pv. aptata DSM 50252	draft	AEAN00000000
Pseudomonas syringae pv. avellanae str. BP631	draft	AKBS00000000
Pseudomonas syringae pv. avellanae str. ISPaVe013	draft	AKCJ00000000
Pseudomonas syringae pv. avellanae str. ISPaVe037	draft	AKCK00000000
Pseudomonas syringae pv. glycinea B076	draft	AEGG01000000
Pseudomonas syringae pv. glycinea race 4	draft	AEGH01000000
Pseudomonas syringae pv. glycinea race 4 A29-2	draft	ADWY00000000
Pseudomonas syringae pv. japonica MAFF 301072 PT	draft	AEAH01000000
Pseudomonas syringae pv. lachrymans M301315	draft	AEAF00000000
Pseudomonas syringae pv. lachrymans MAFF 302278 PT	draft	AEAM00000000
Pseudomonas syringae pv. maculicola F1	draft	http://genome.ppws.vt.edu/blast/blast.html (not yet submitted and no accession number)
Pseudomonas syringae pv. maculicola M3	draft	http://genome.ppws.vt.edu/blast/blast.html
Pseudomonas syringae pv. maculicola M6	draft	http://genome.ppws.vt.edu/blast/blast.html (not yet submitted and no accession number)
Pseudomonas syringae pv. mori MAFF 301020	draft	AEAG00000000
Pseudomonas syringae pv. morsprunorum MAFF 302280 PT	draft	AEAE00000000
Pseudomonas syringae pv. phaseolicola 1448A	closed	NC_005773
Pseudomonas syringae pv. pisi 1704B	draft	AEAI00000000
Pseudomonas syringae pv. syringae B728a	closed	NC_007005
Pseudomonas syringae pv. syringae FF5	draft	NZ_ACXZ00000000
Pseudomonas syringae pv. tabaci ATCC 11528	draft	NZ_ACHU00000000
Pseudomonas syringae pv. theae NCPPB 2598	draft	AGNN00000000
Pseudomonas syringae pv. tomato DC3000	closed	NC_004578
Pseudomonas syringae pv. tomato JL1065	draft	http://genome.ppws.vt.edu/blast/blast.html (not yet submitted and no accession number)
Pseudomonas syringae pv. tomato T1	draft	NZ_ABSM00000000
Pseudomonas viridiflava UASWS0038	draft	AMQP00000000
