# Supplementary material
Source: publisher figshare collection journal article supplement (https://plos.figshare.com/articles/dataset/_/662335)
Supplement: Supplementary file [file 1]

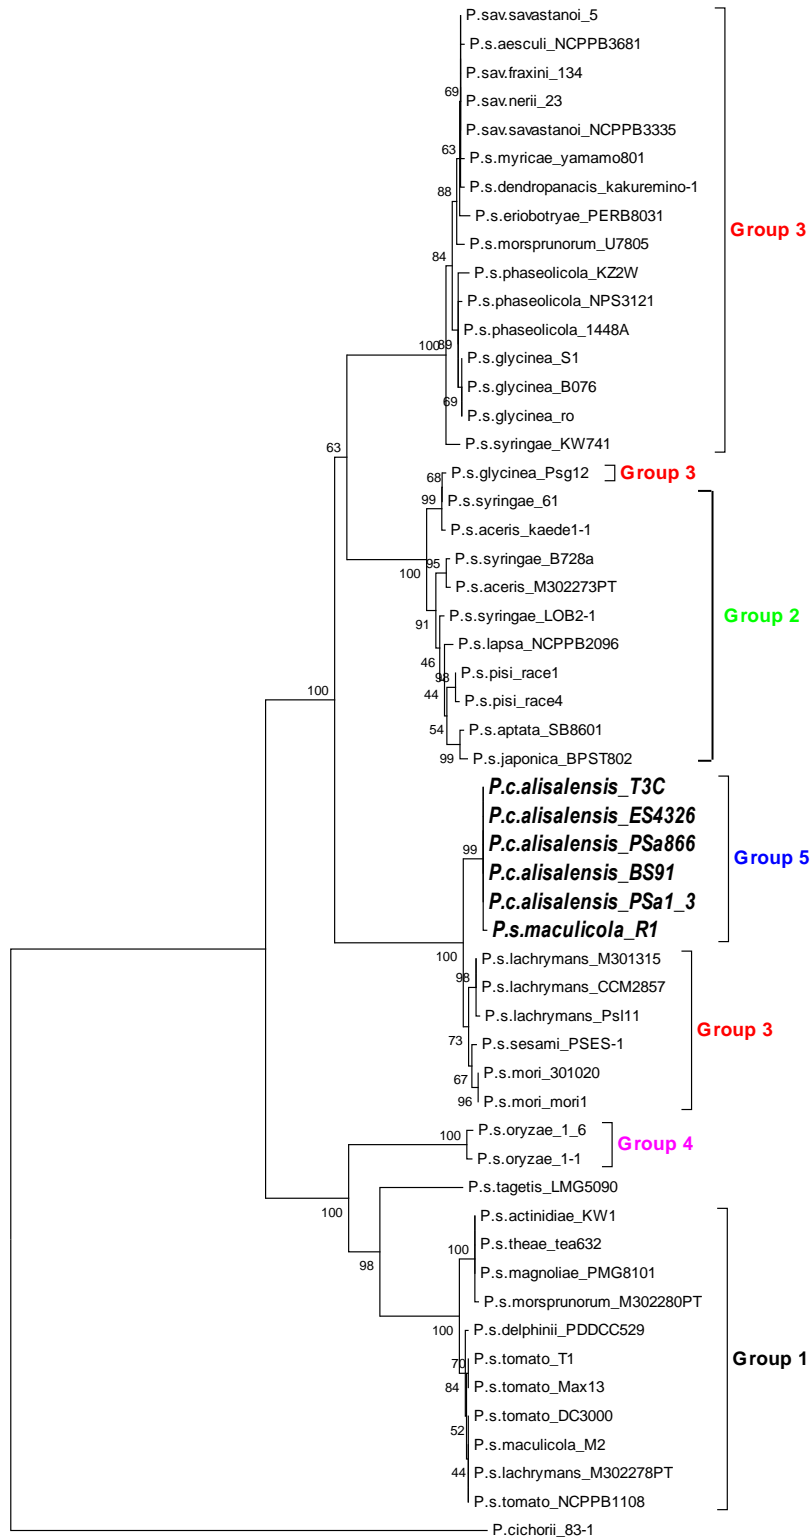

HrpZ : Amino-acid based phylogenetic tree

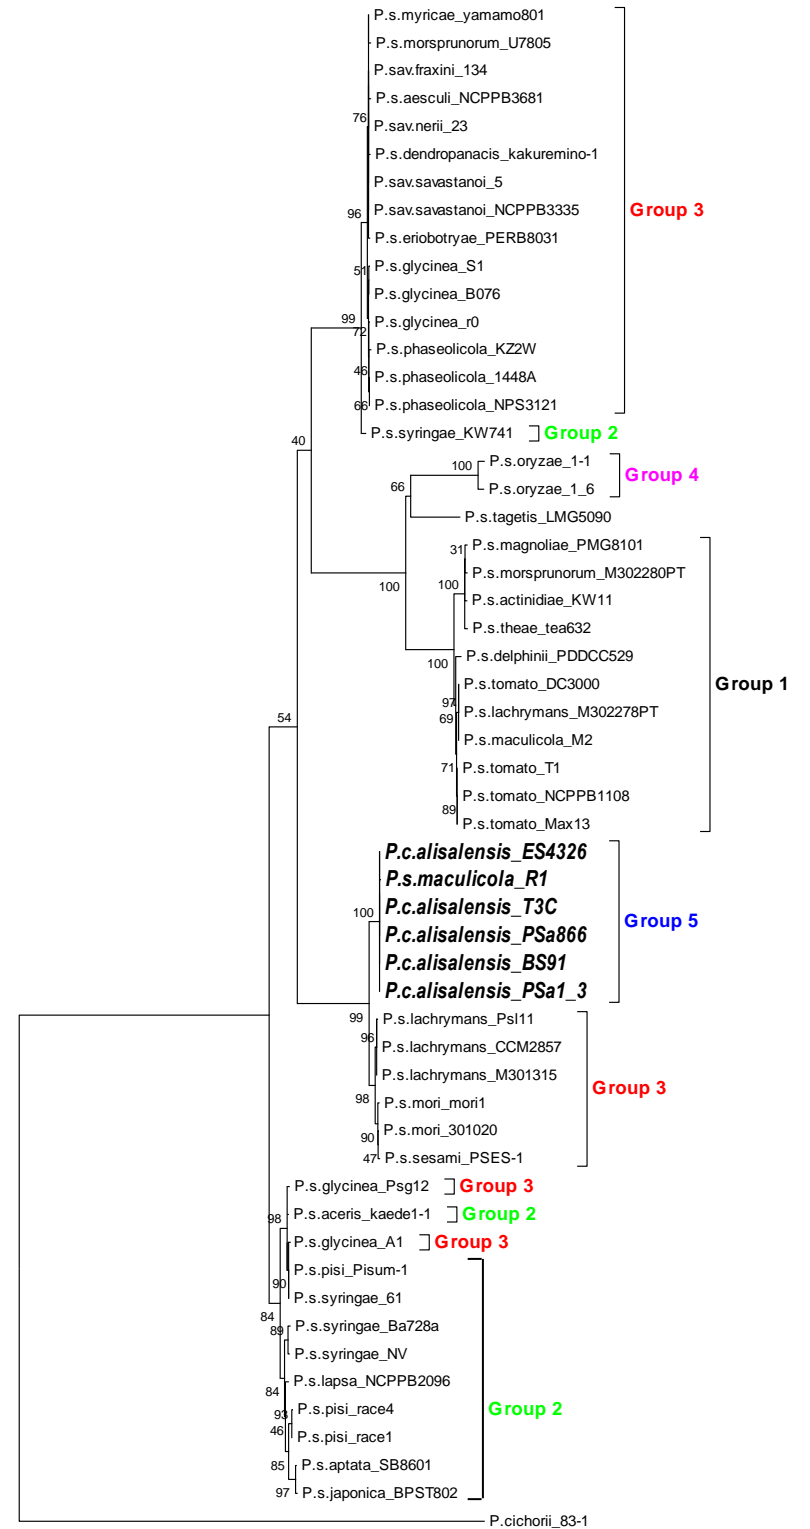

hrpZ : Nucleotide based phylogenetic tree

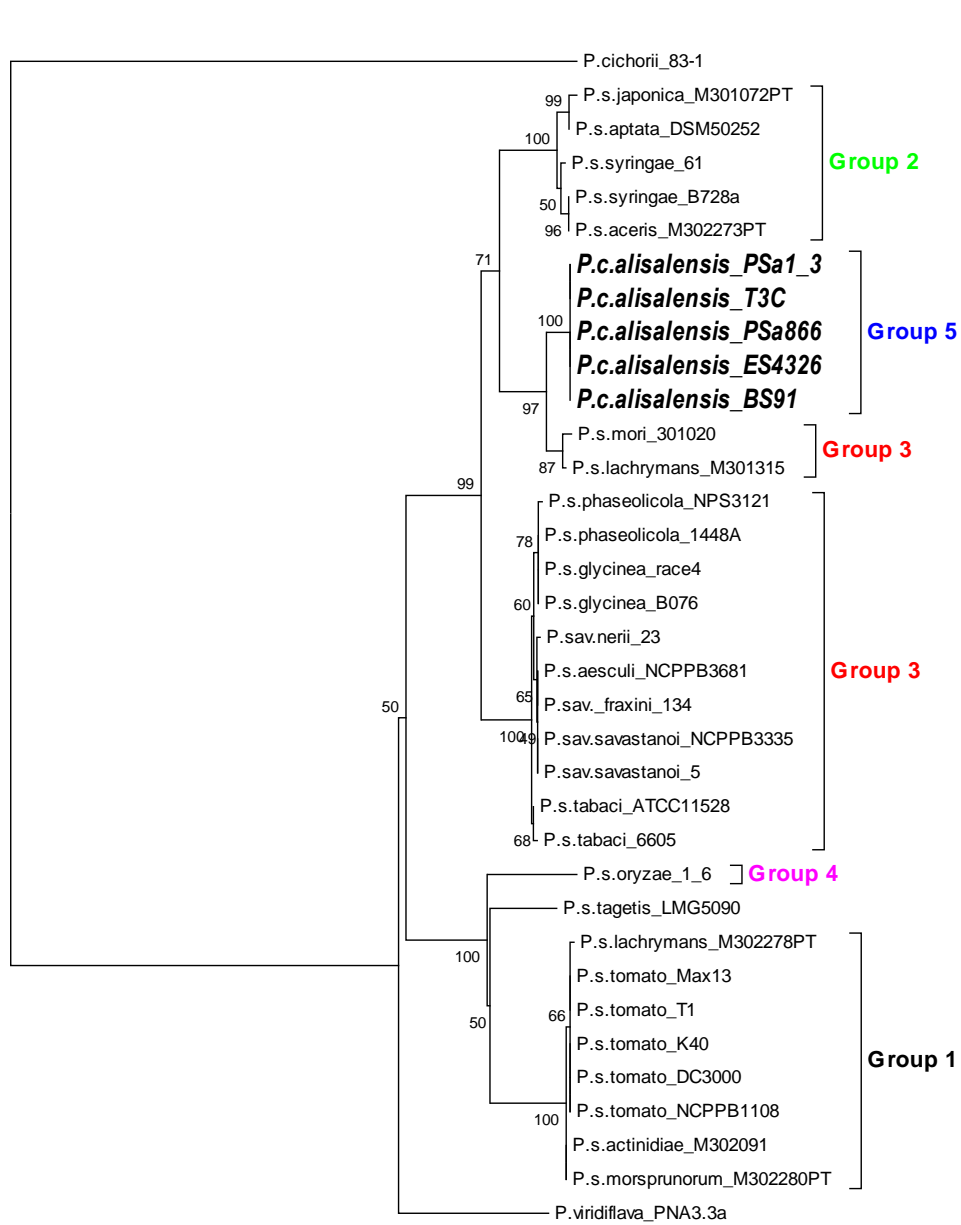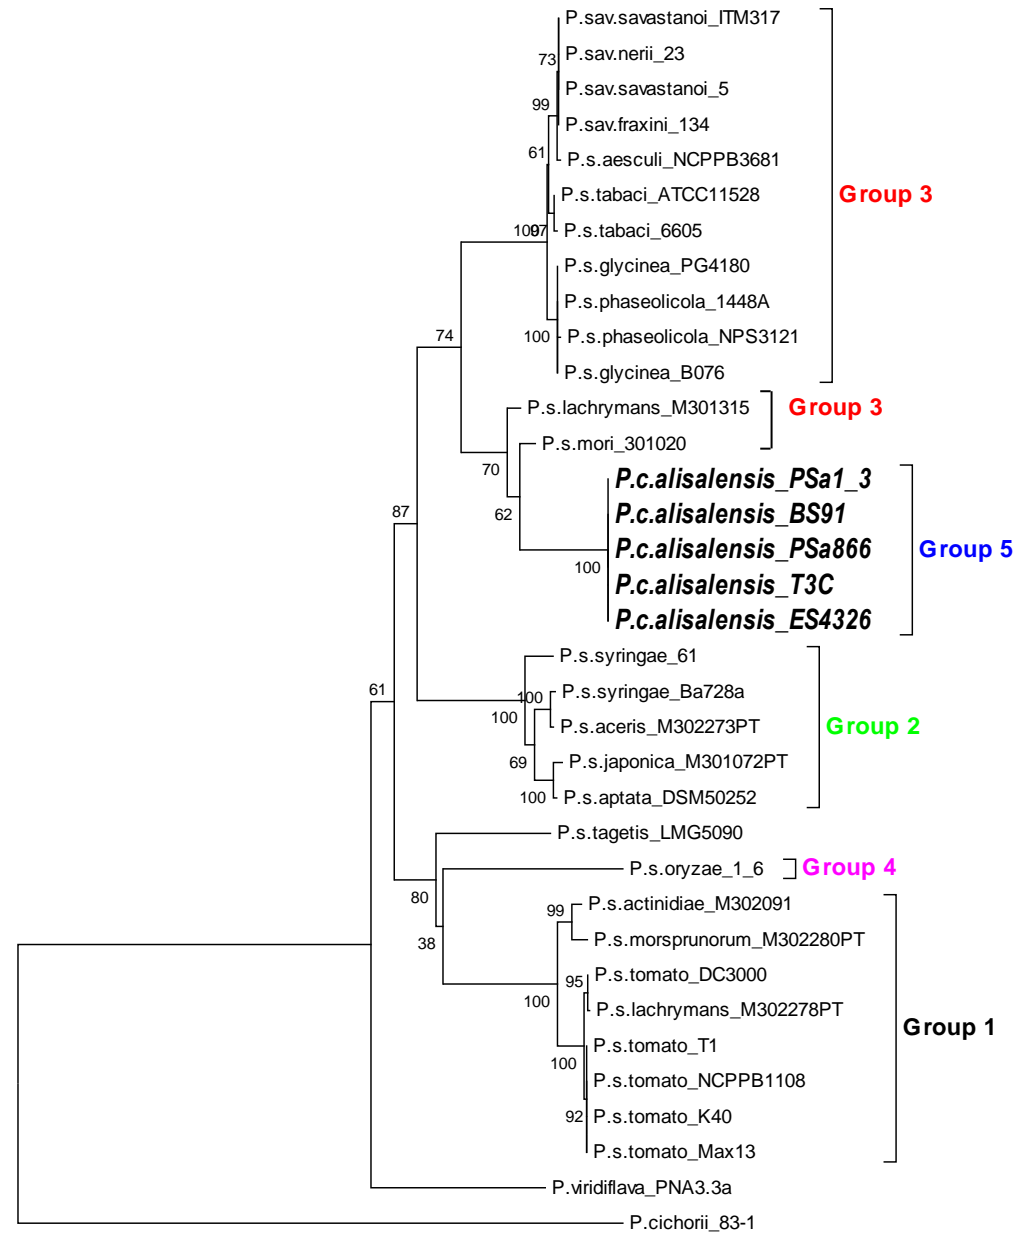

Figure S3
