# Supplementary material
Source: publisher figshare collection journal article supplement (https://plos.figshare.com/articles/dataset/_/662335)
Supplement: Supplementary file [file 1]

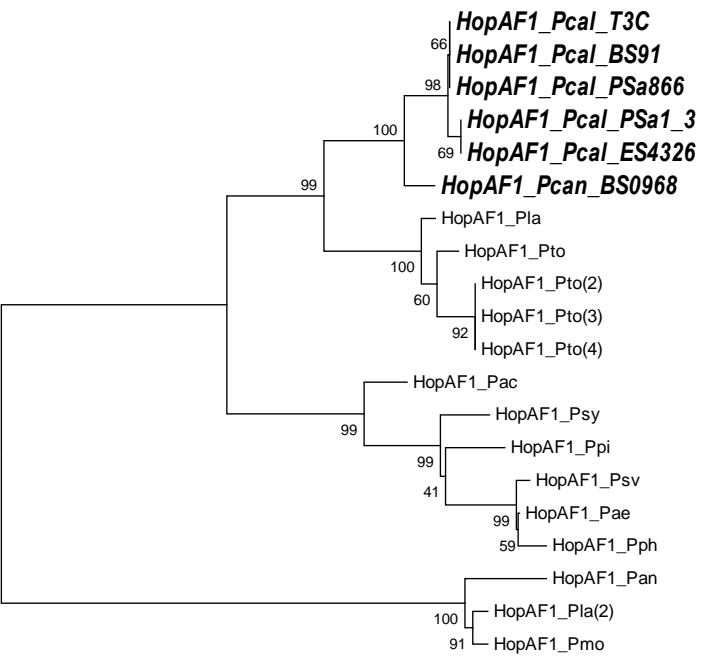

0.02

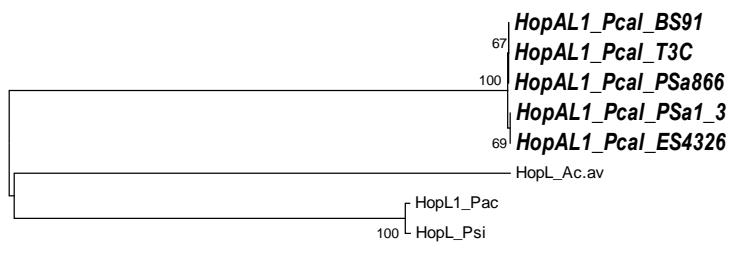

0.1

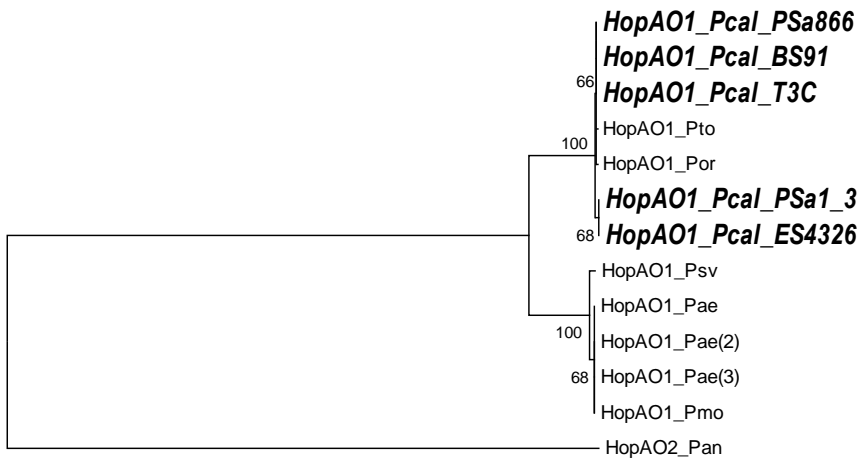

0.05

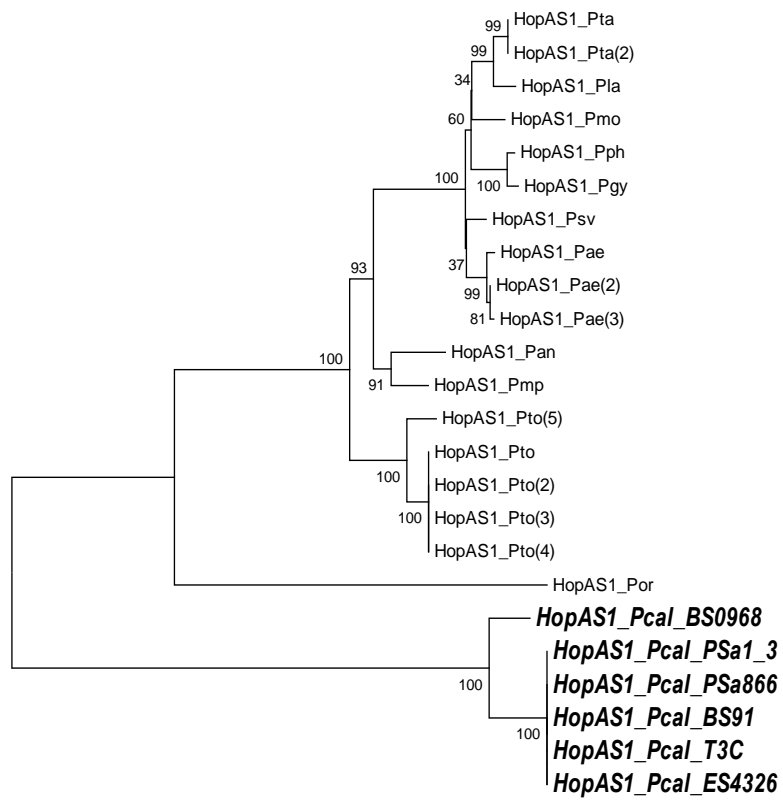

0.02

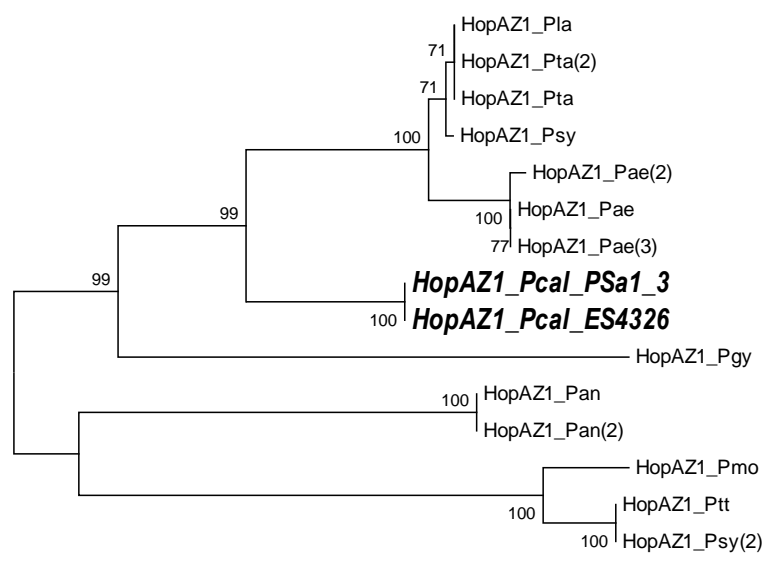

0.05

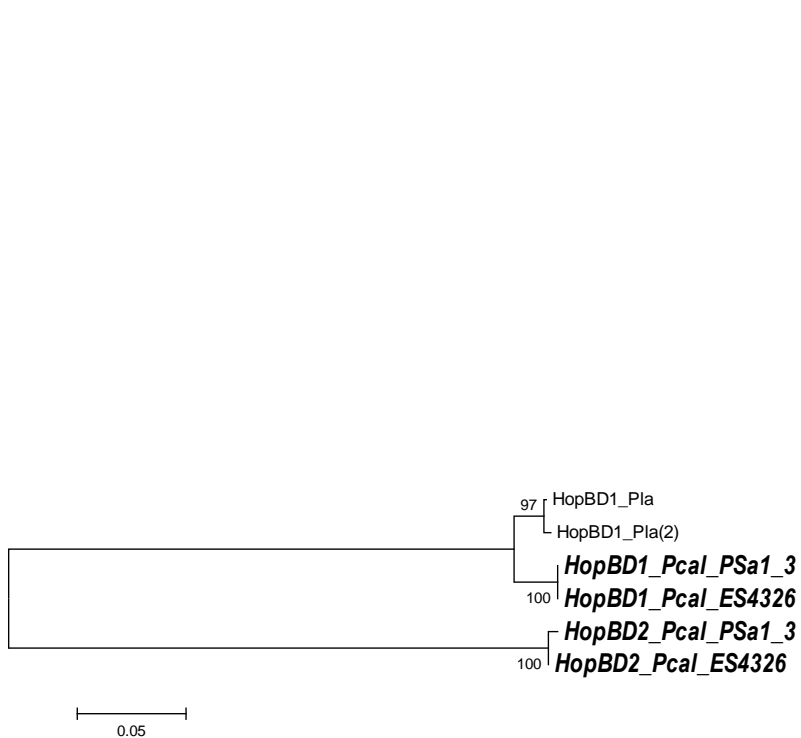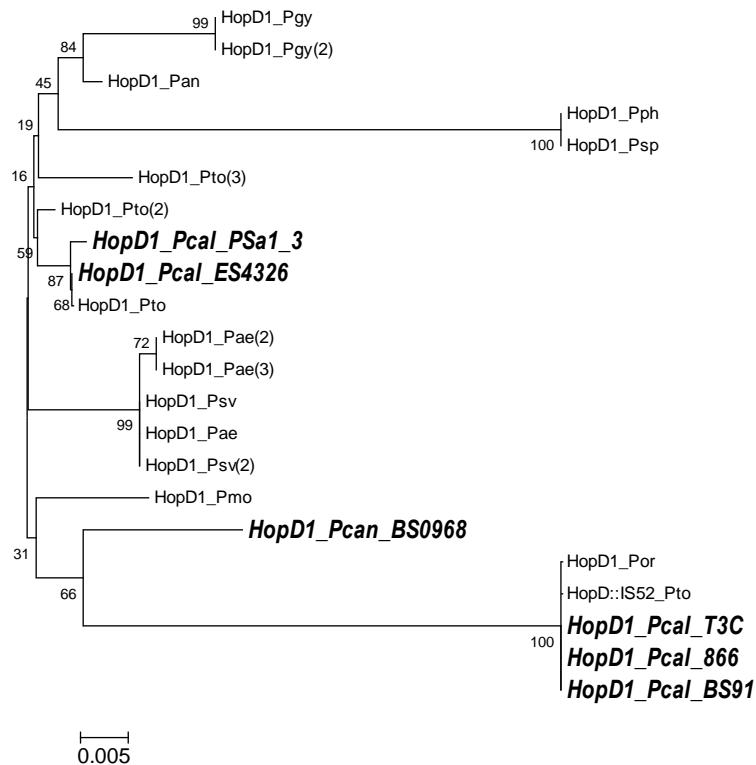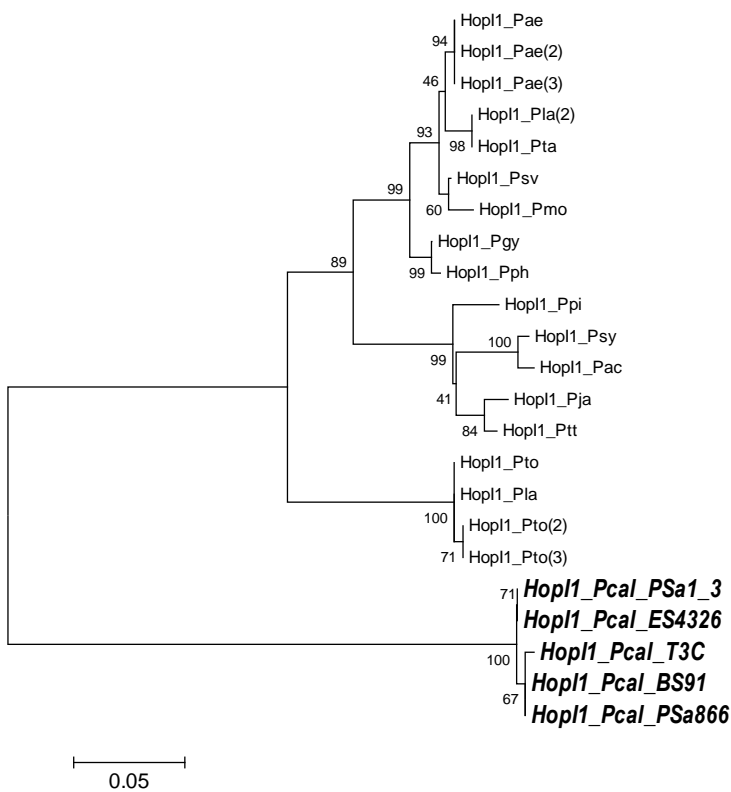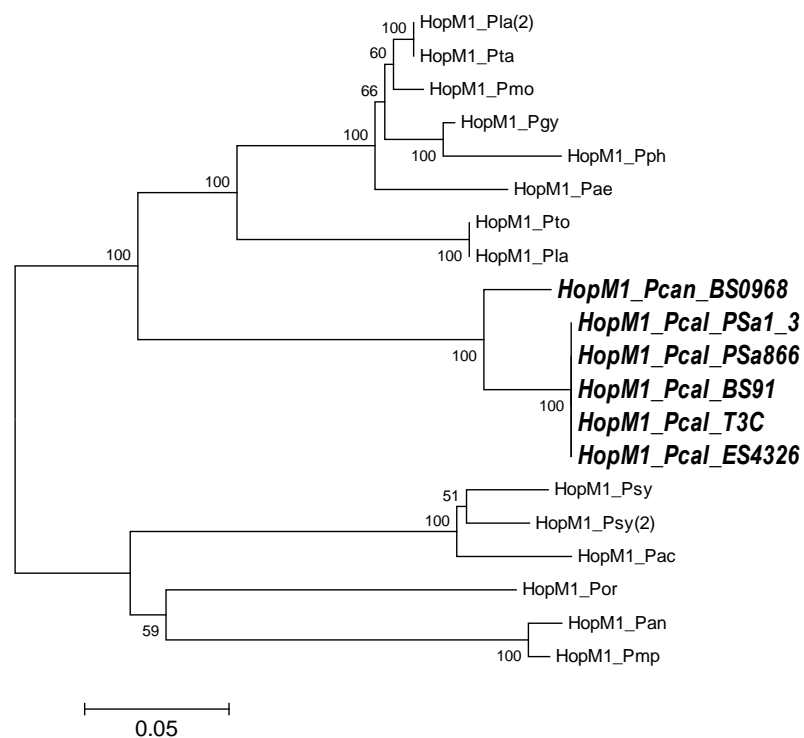

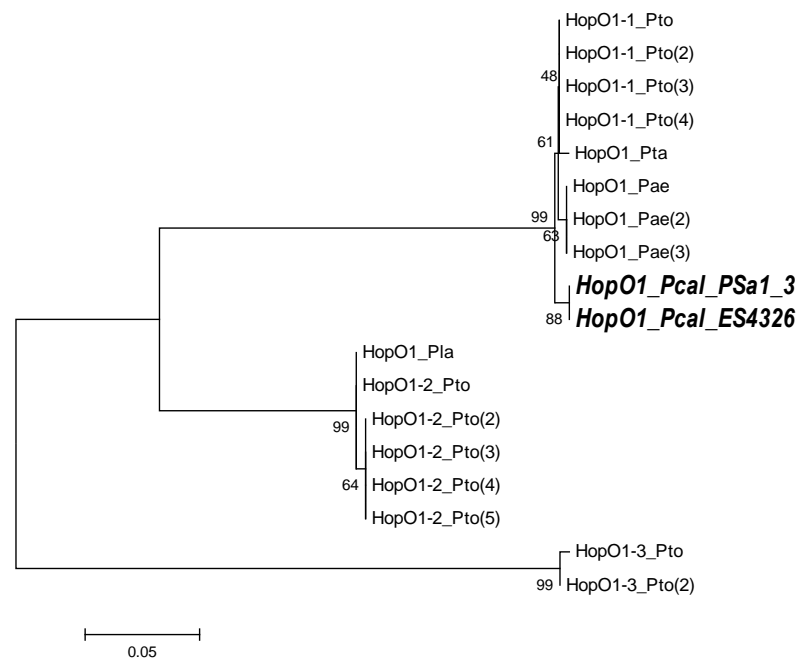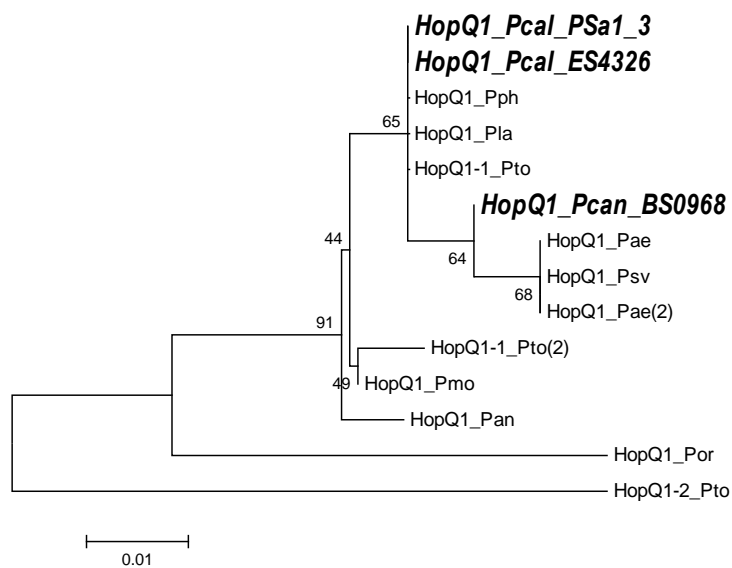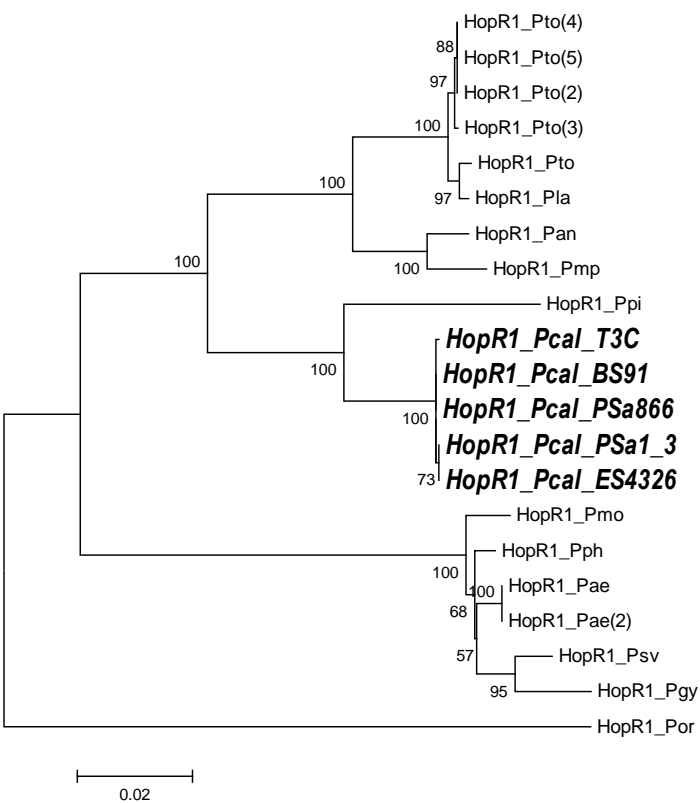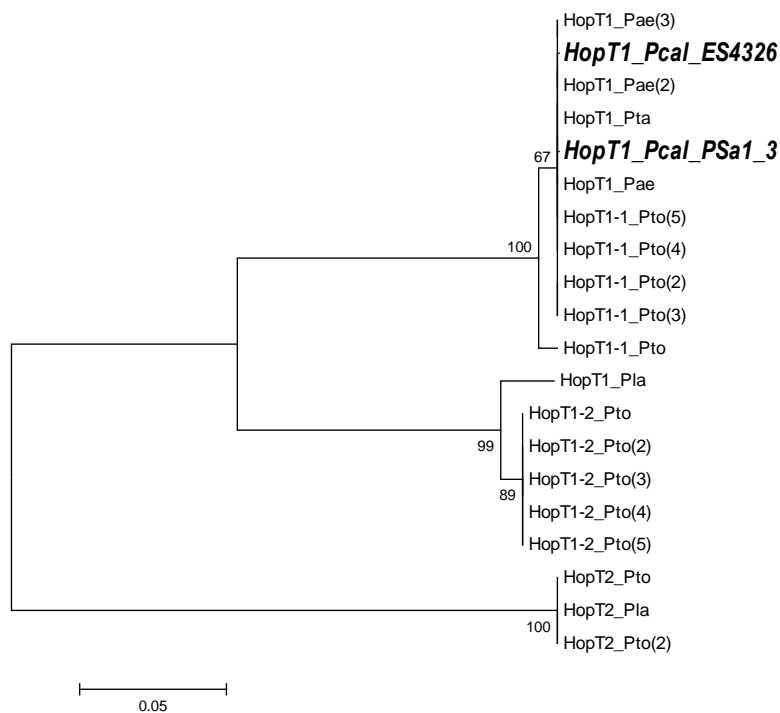

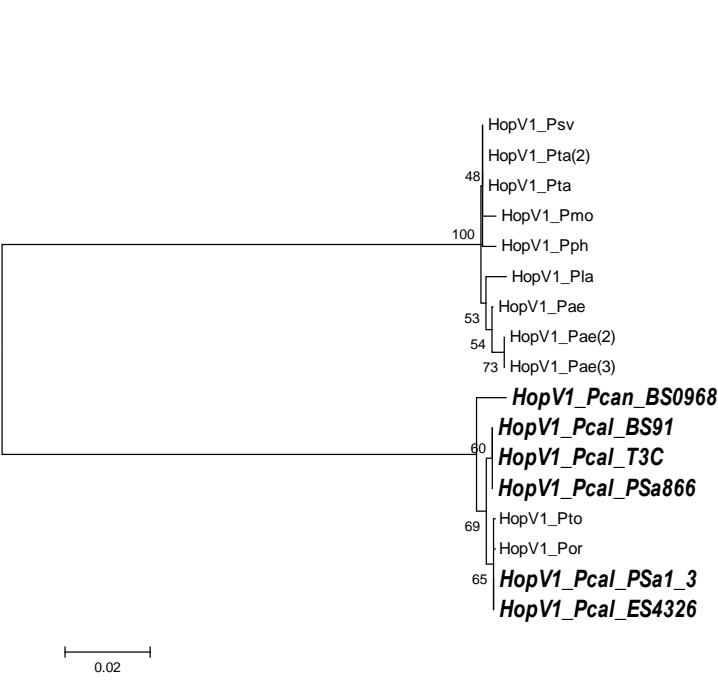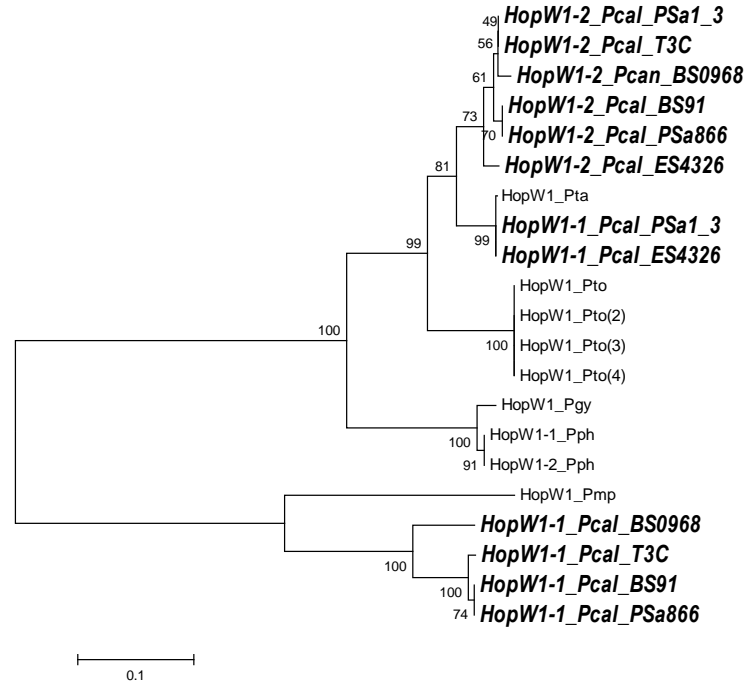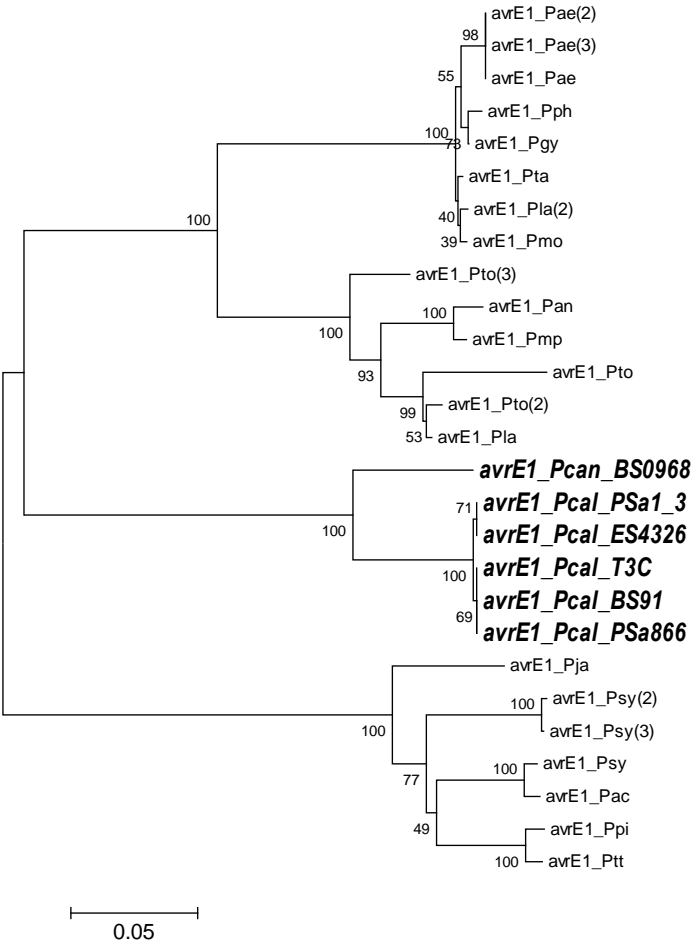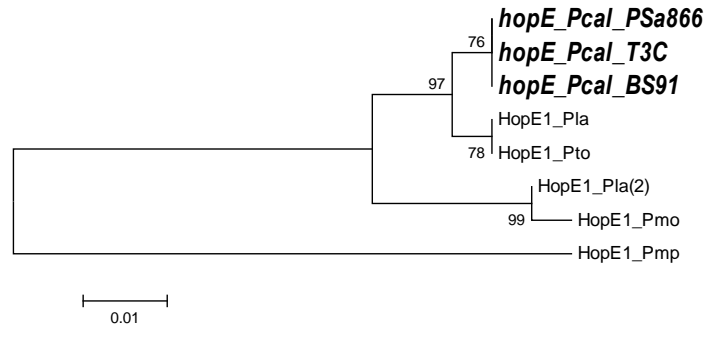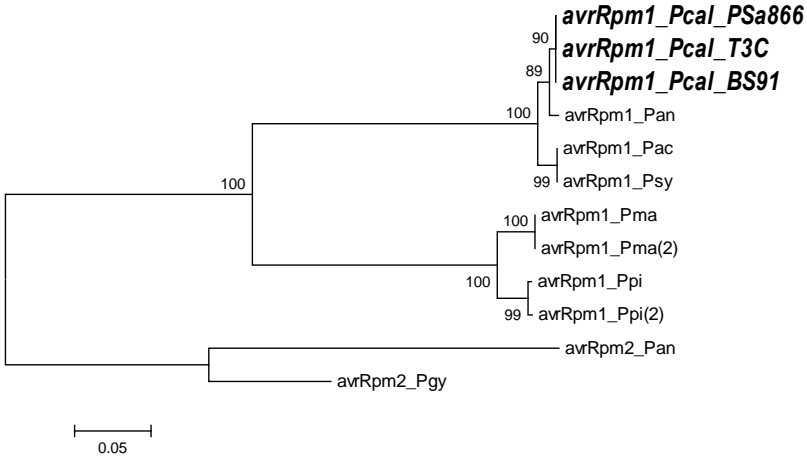

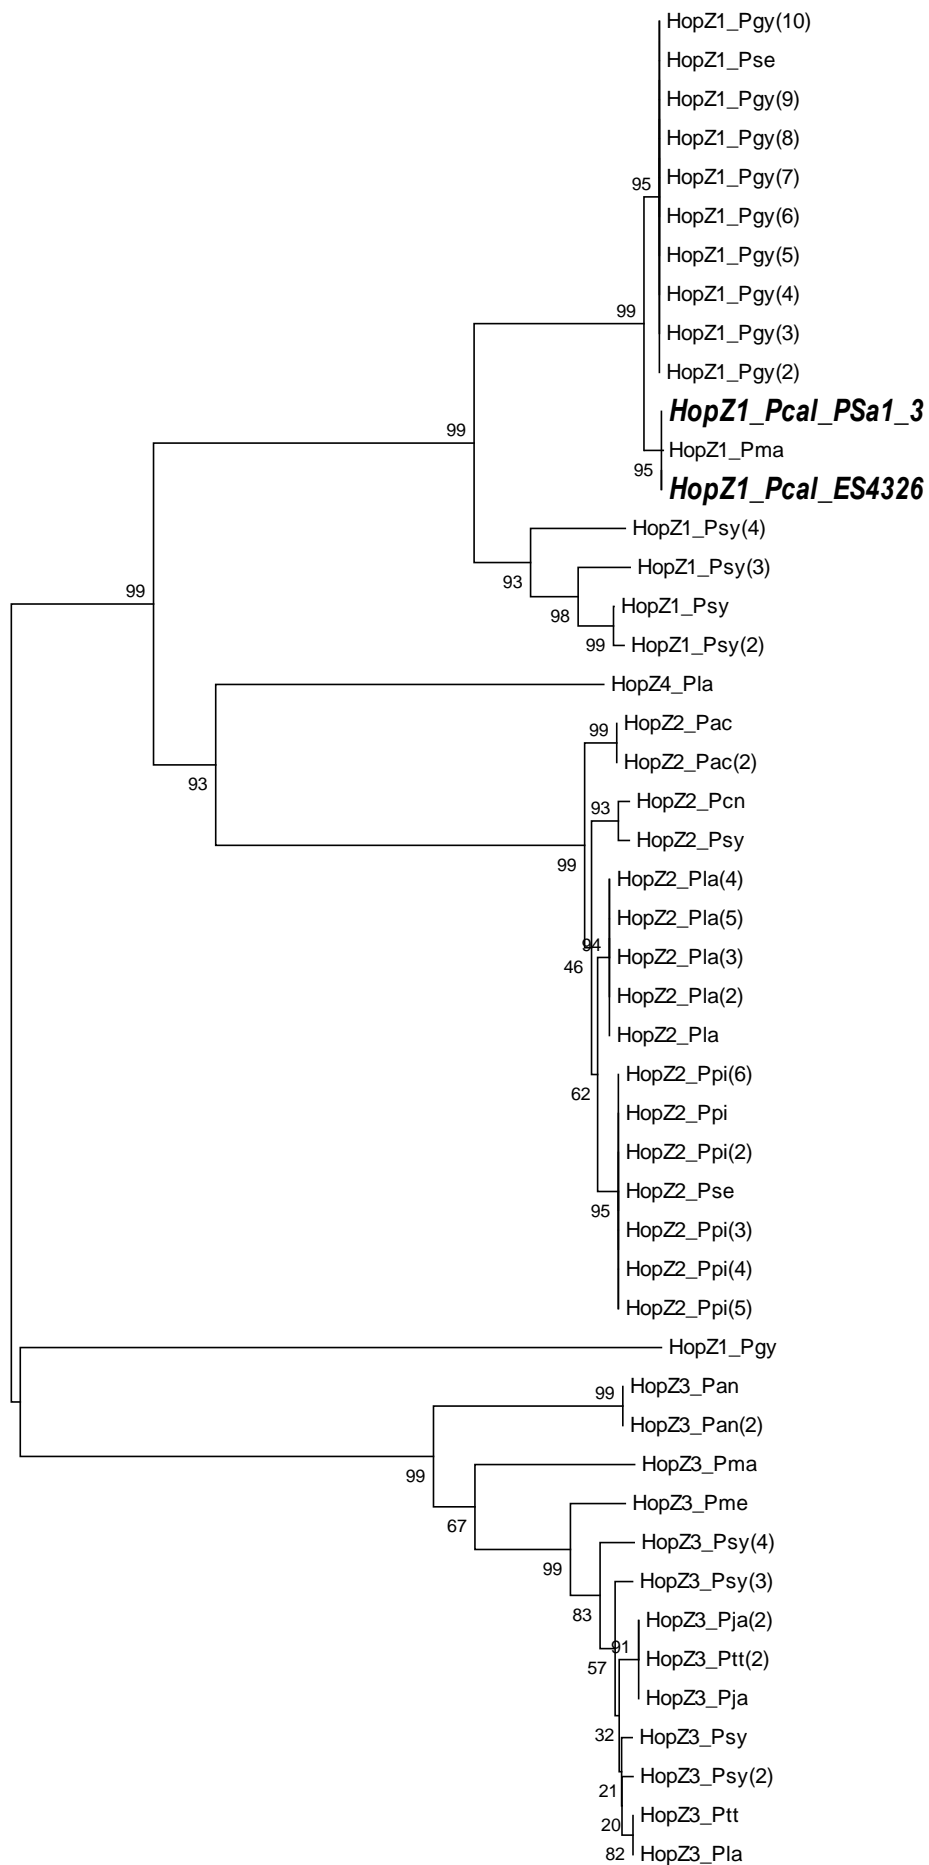

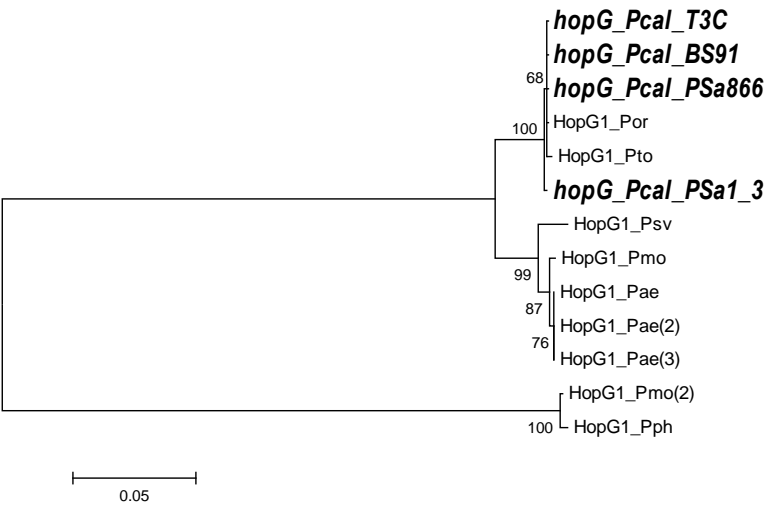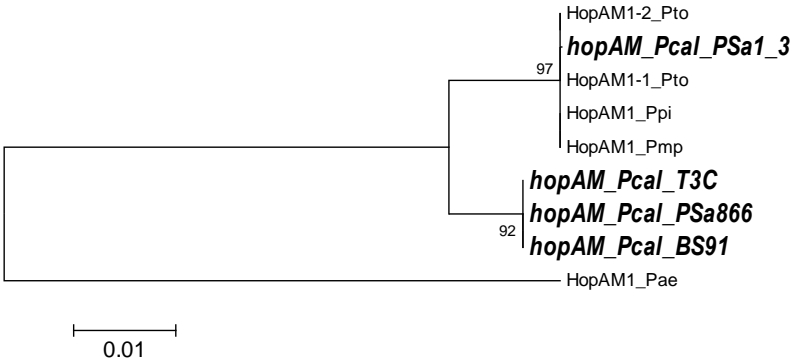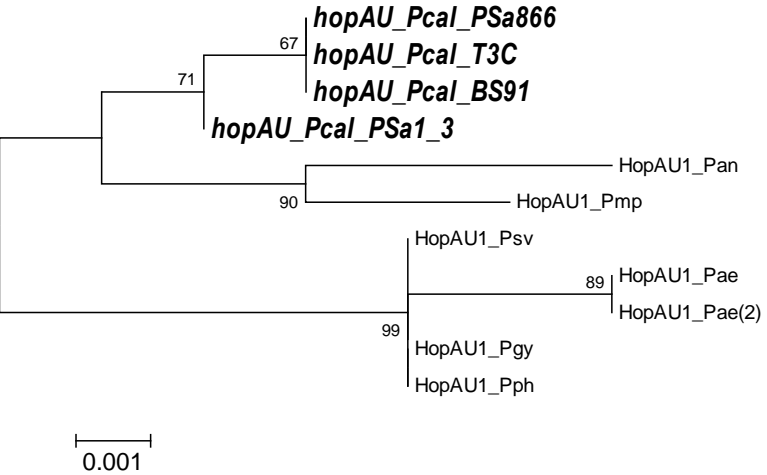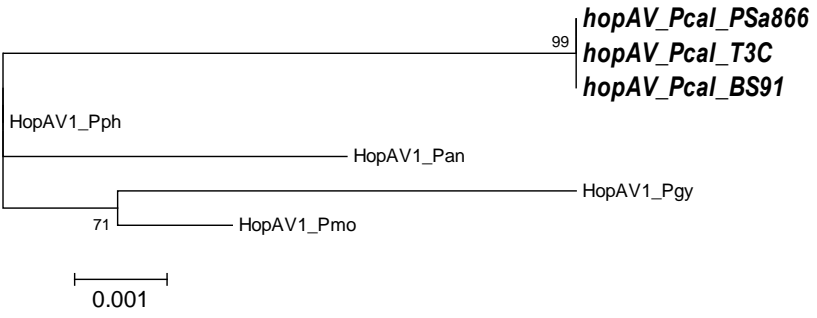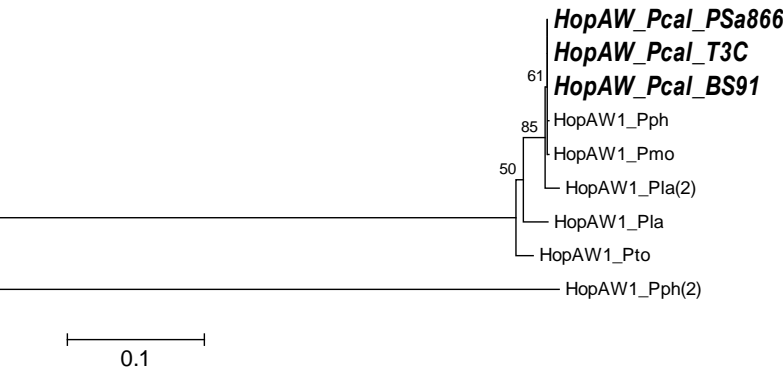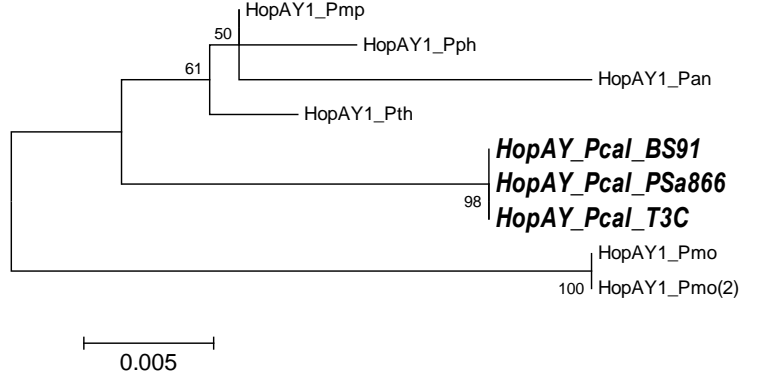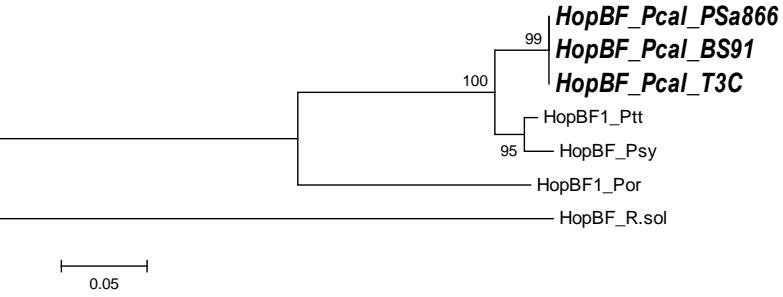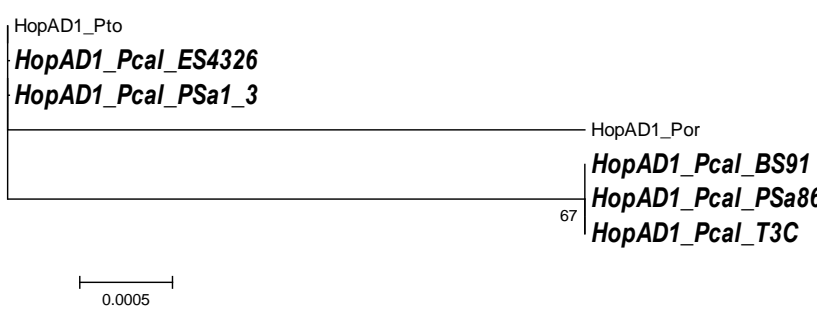

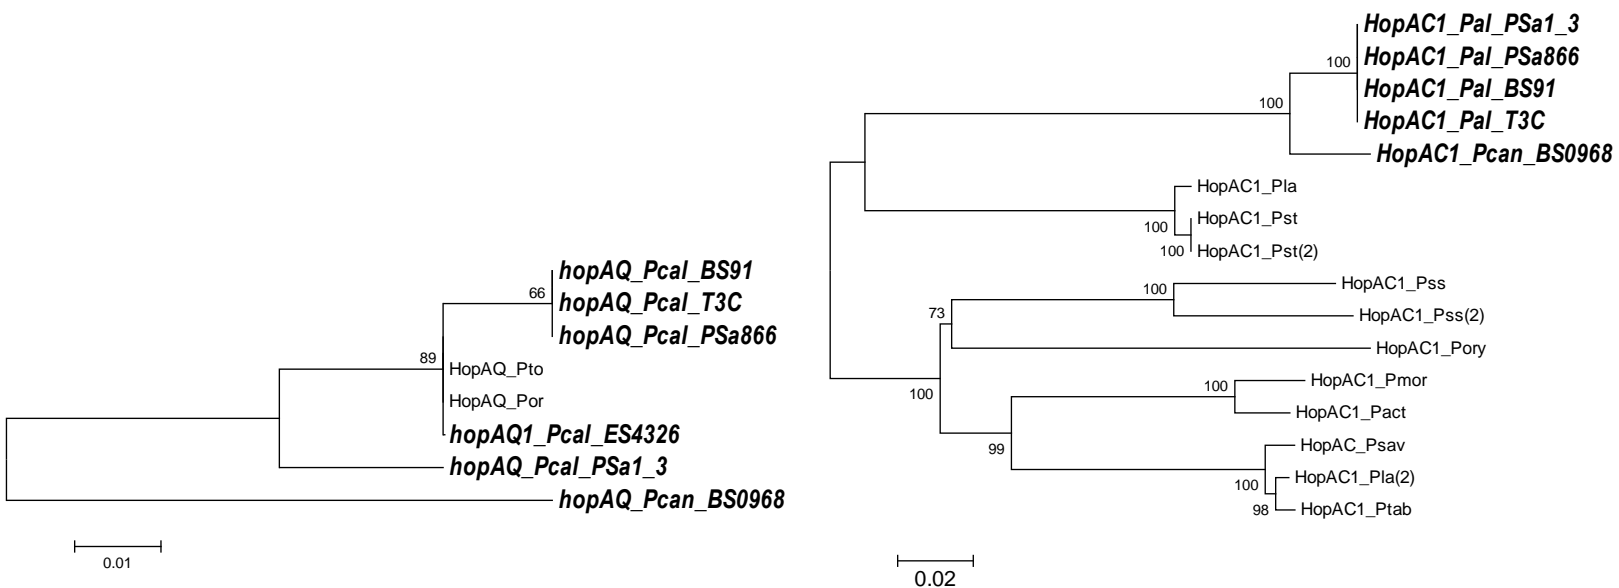

Figure S4
