# Supplementary material
Source: publisher figshare collection journal article supplement (https://plos.figshare.com/articles/dataset/_/662335)
Supplement: Supplementary file [file 1]

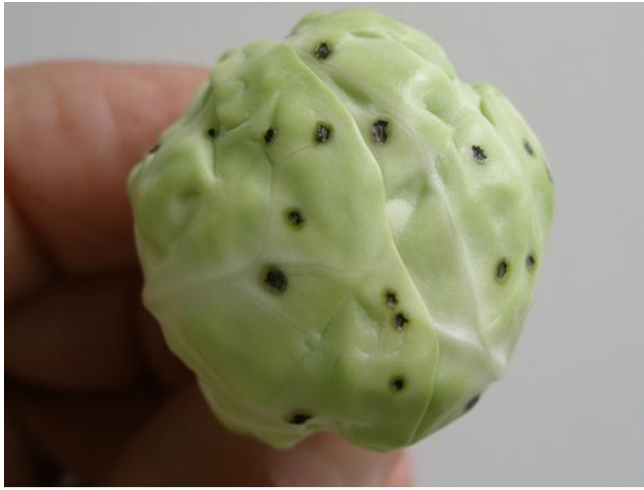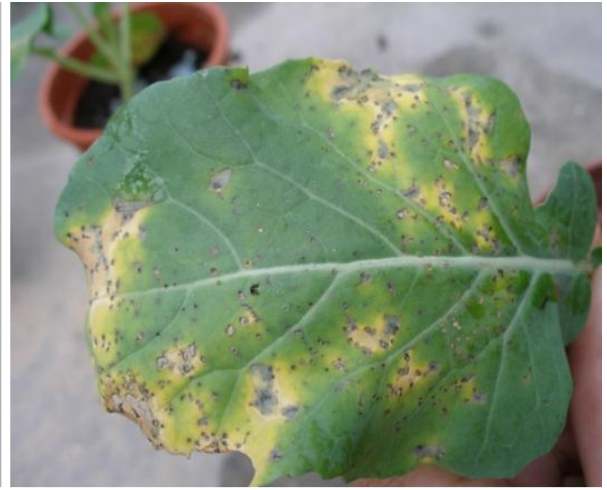

***Brassica oleracea***

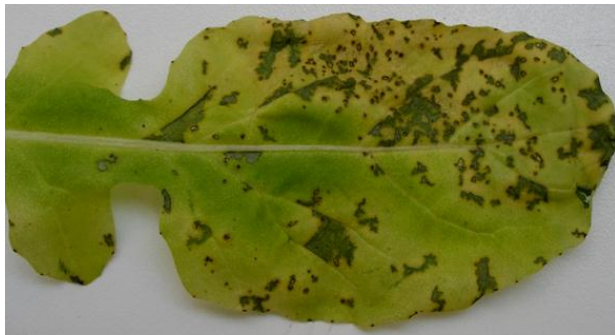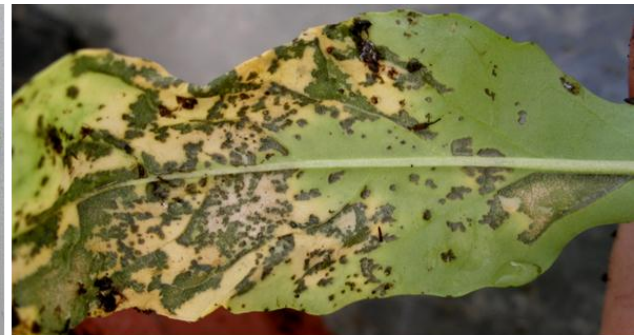

***Eruca sativa***

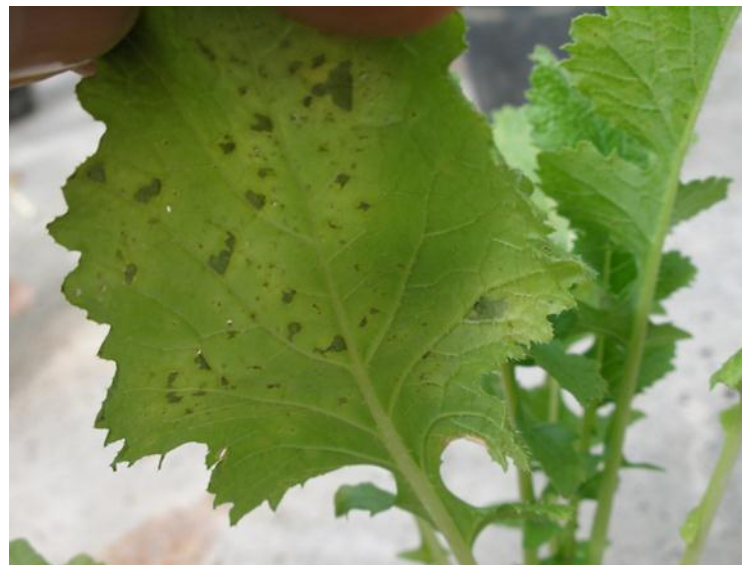

***Brassica napus***

Figure S1
