# Supplementary material
Source: publisher figshare collection journal article supplement (https://plos.figshare.com/articles/dataset/_/662335)

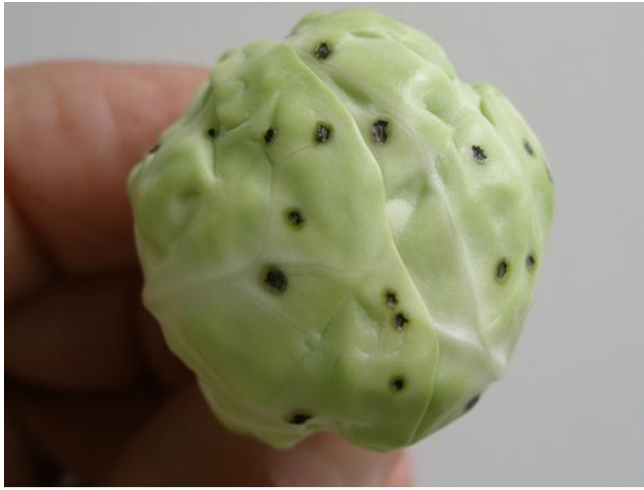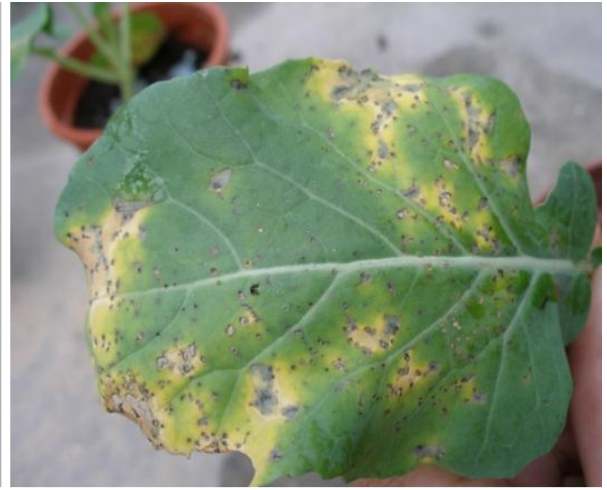

***Brassica oleracea***

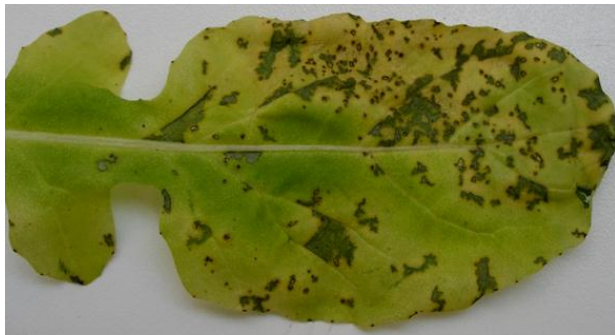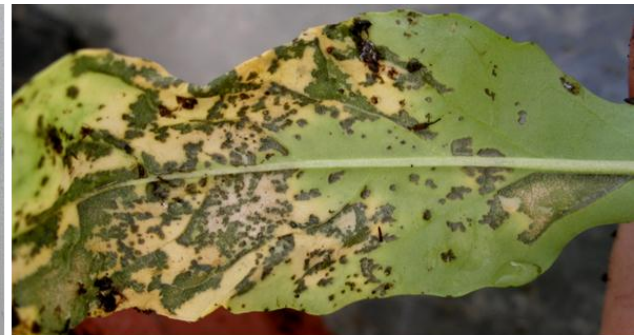

***Eruca sativa***

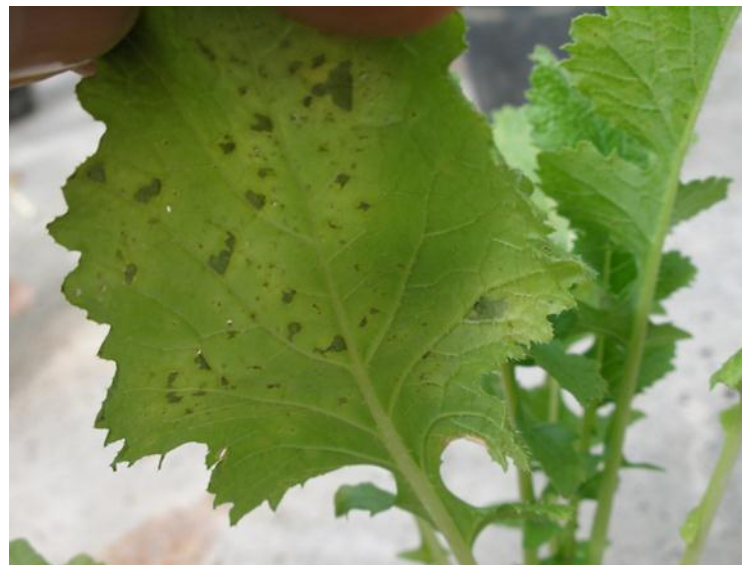

***Brassica napus***

Figure S1

Supplement: Supplementary file 1 [file 1 › Figure_S1.pdf]

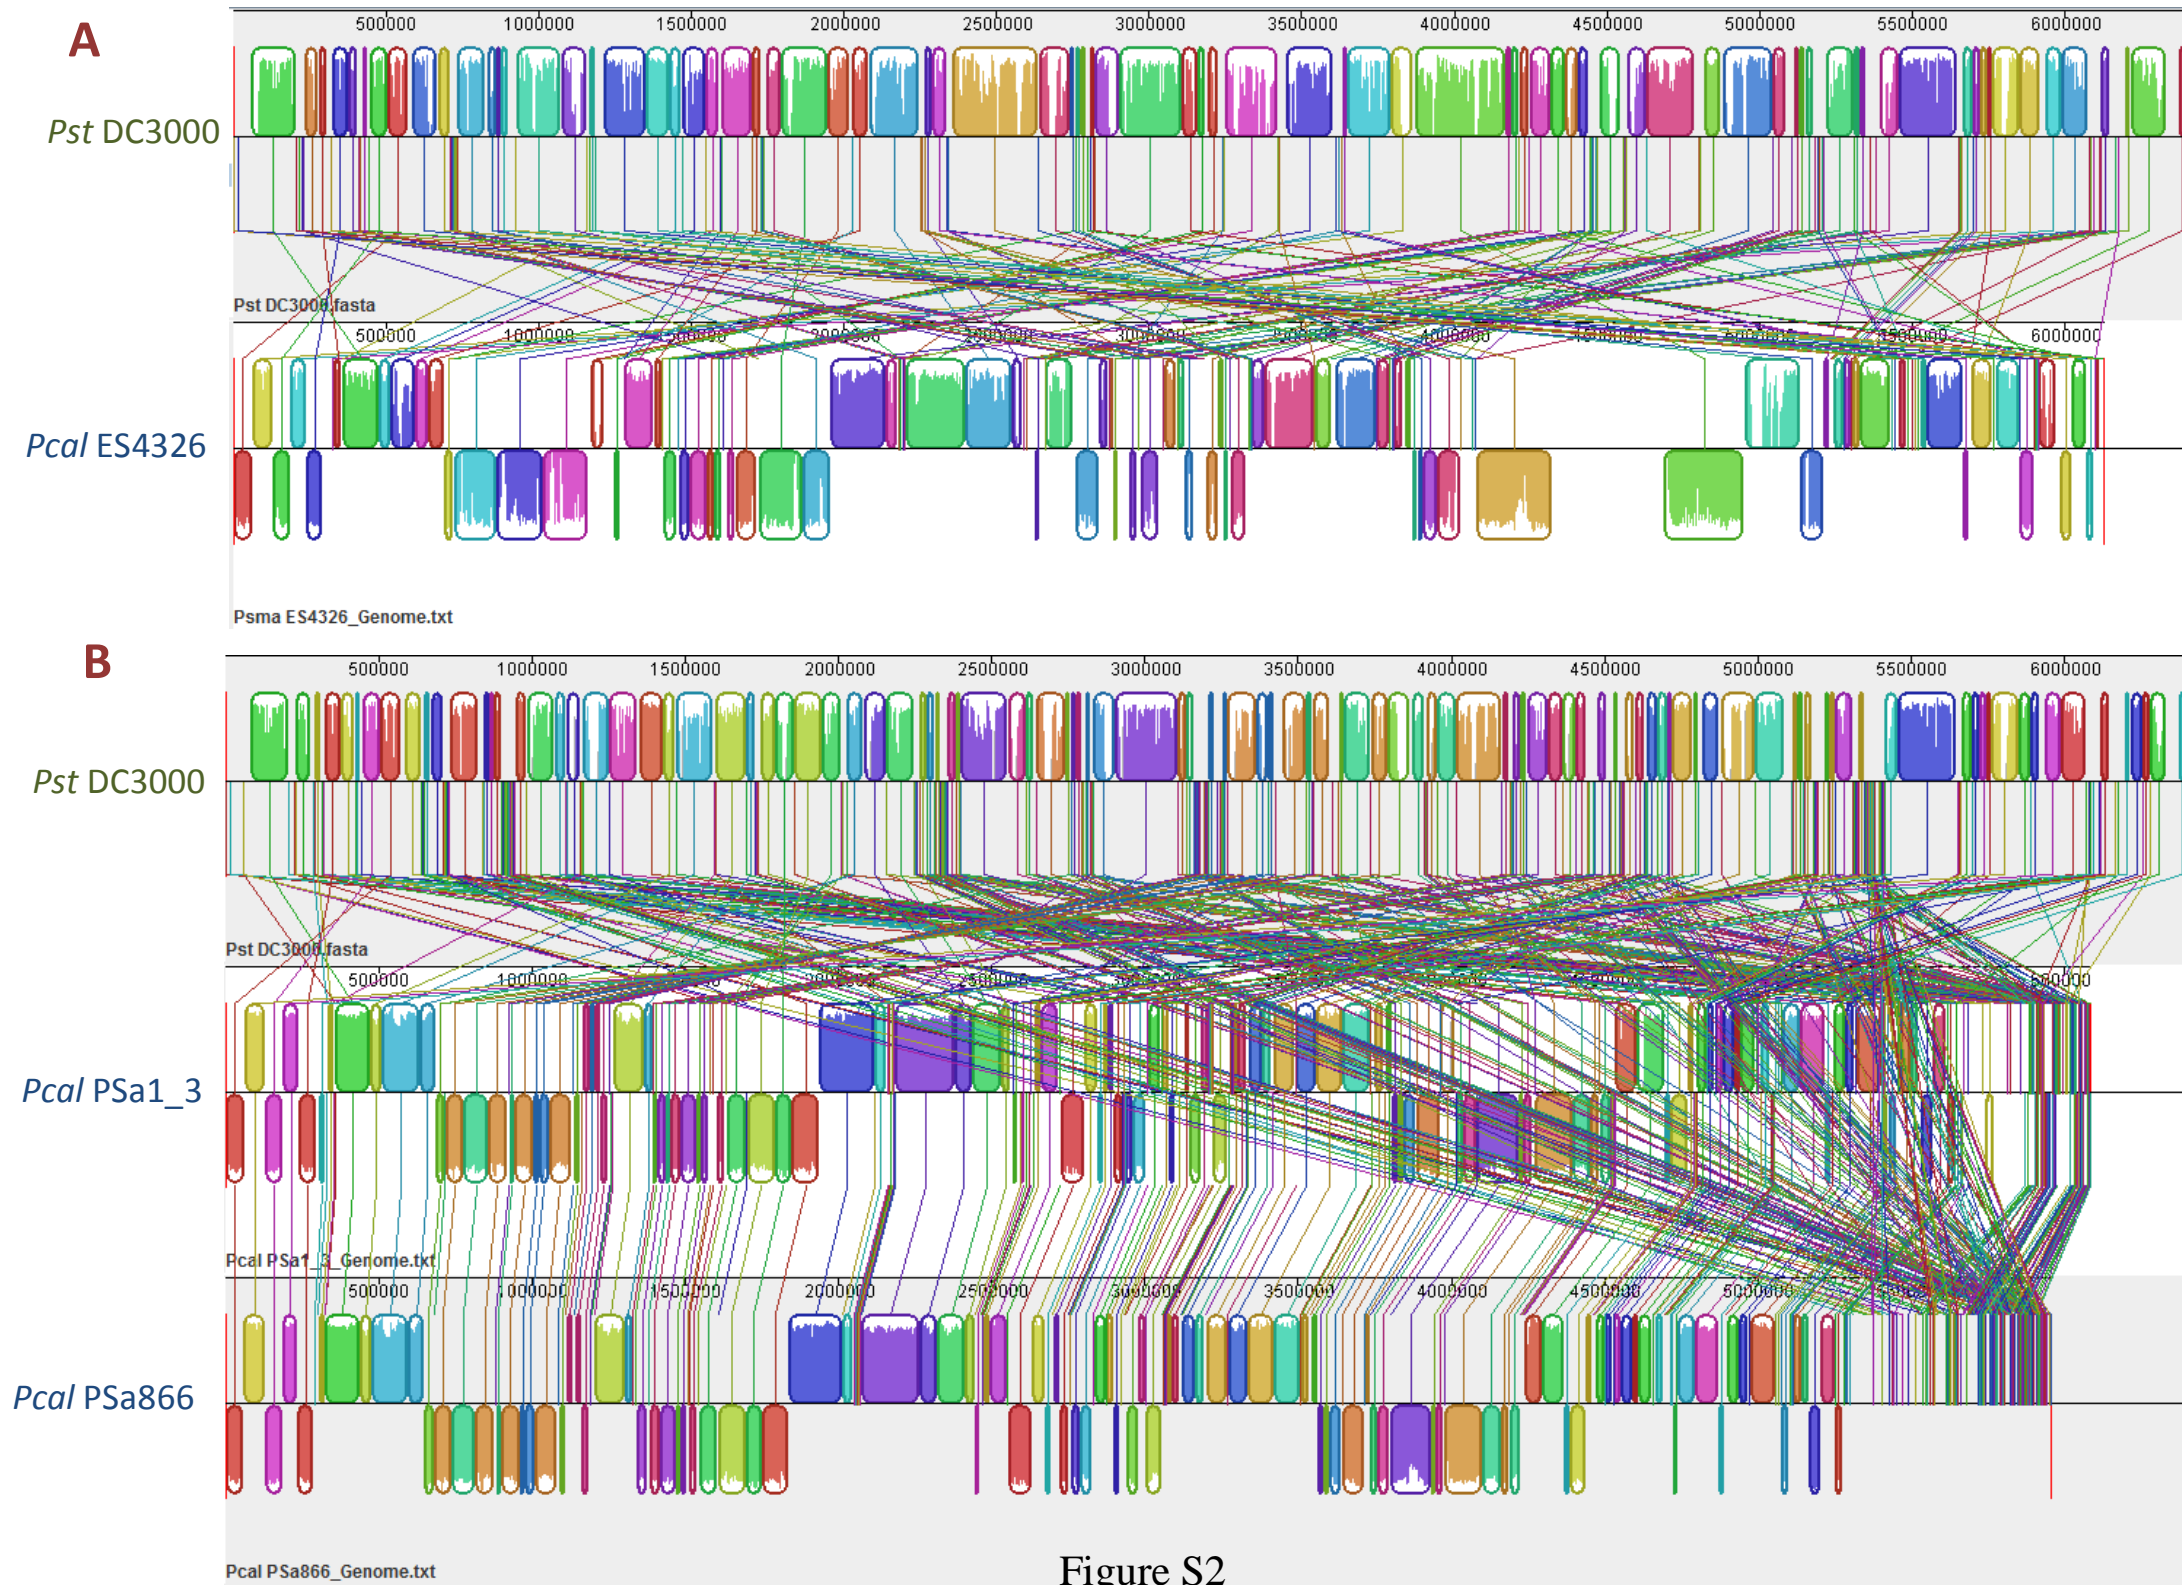

Supplement: Supplementary file 1 [file 1 › Figure_S2.pdf]

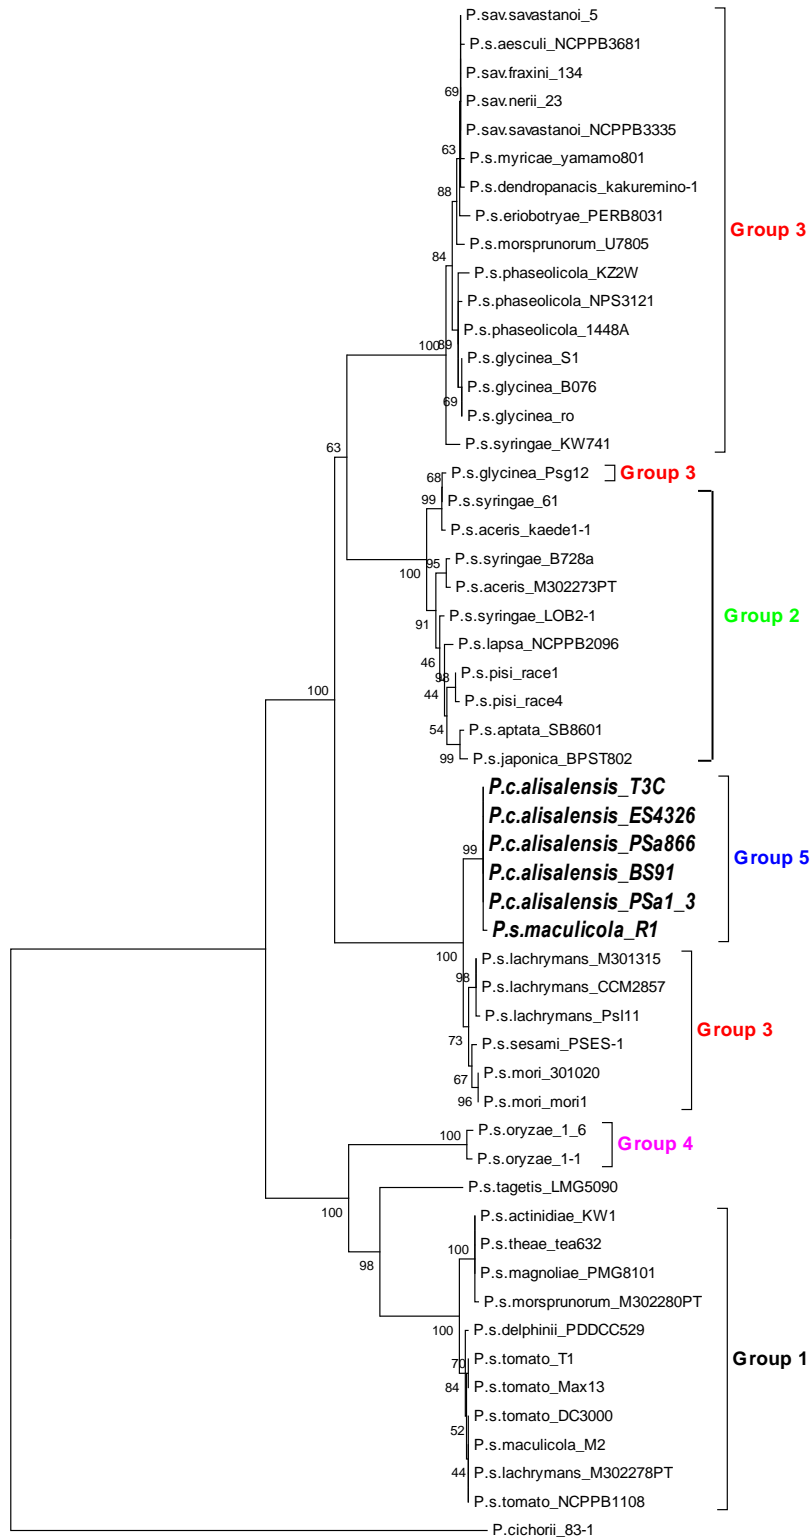

HrpZ : Amino-acid based phylogenetic tree

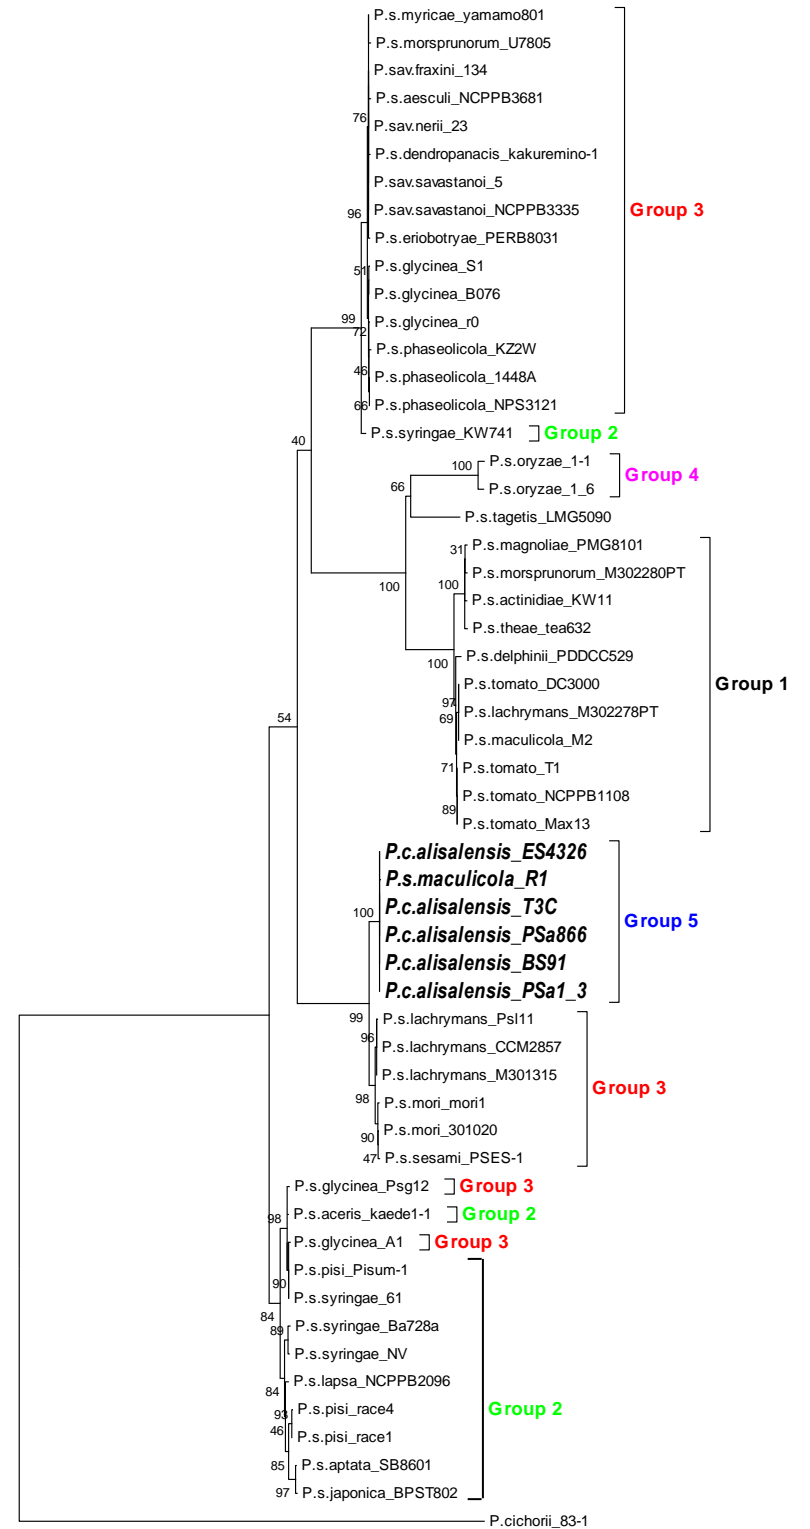

hrpZ : Nucleotide based phylogenetic tree

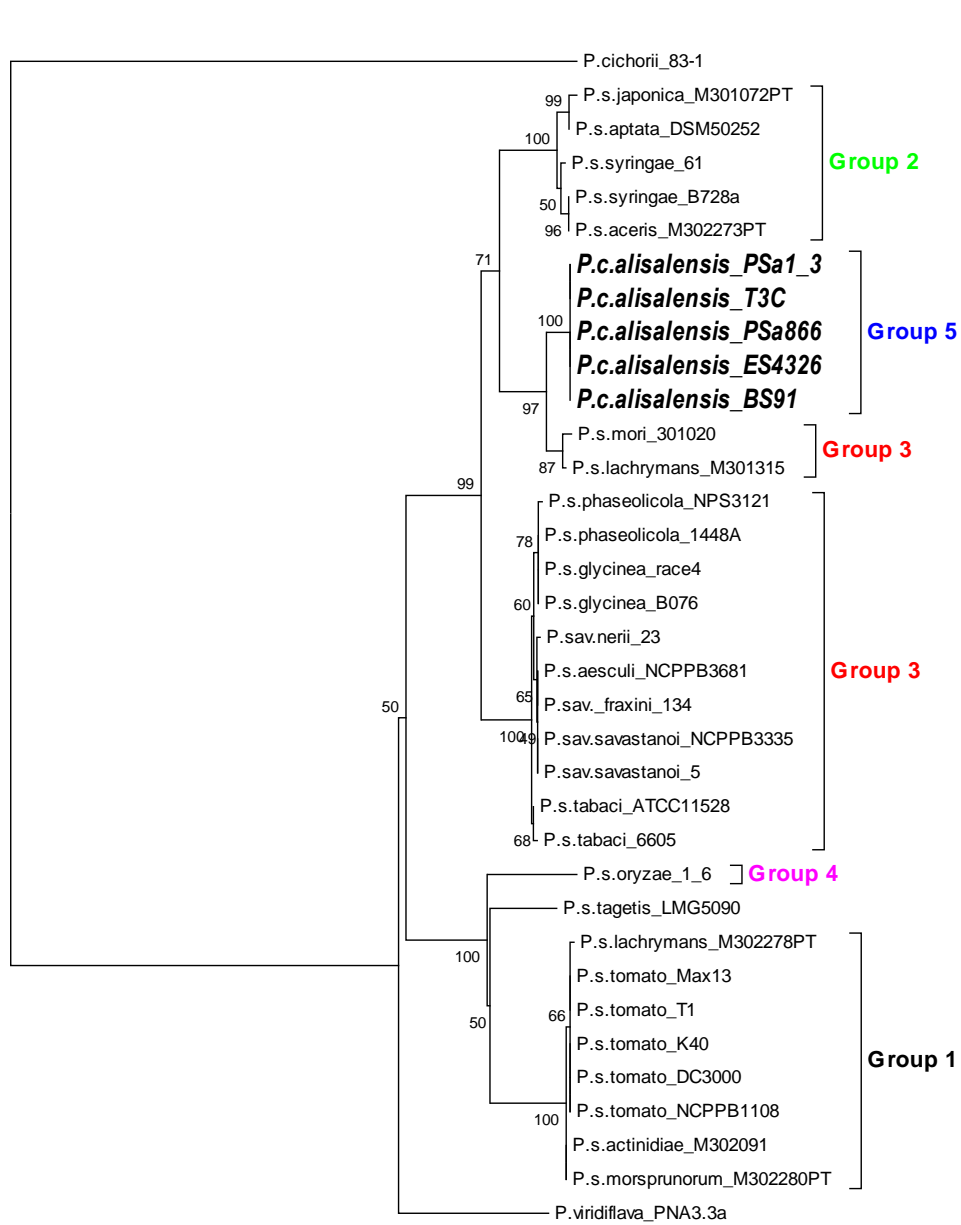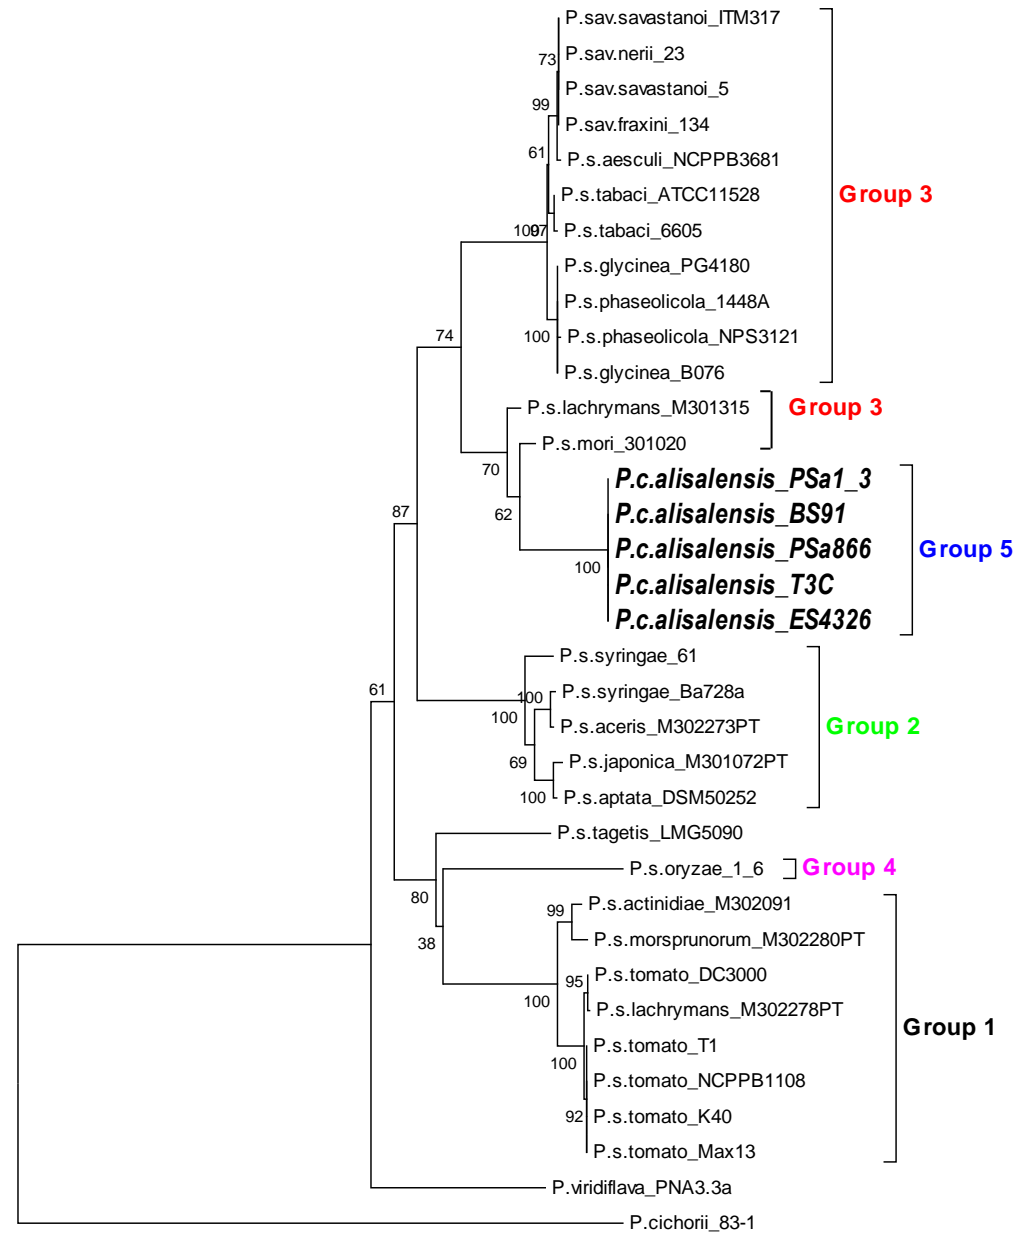

Figure S3

Supplement: Supplementary file 1 [file 1 › Figure_S3.pdf]

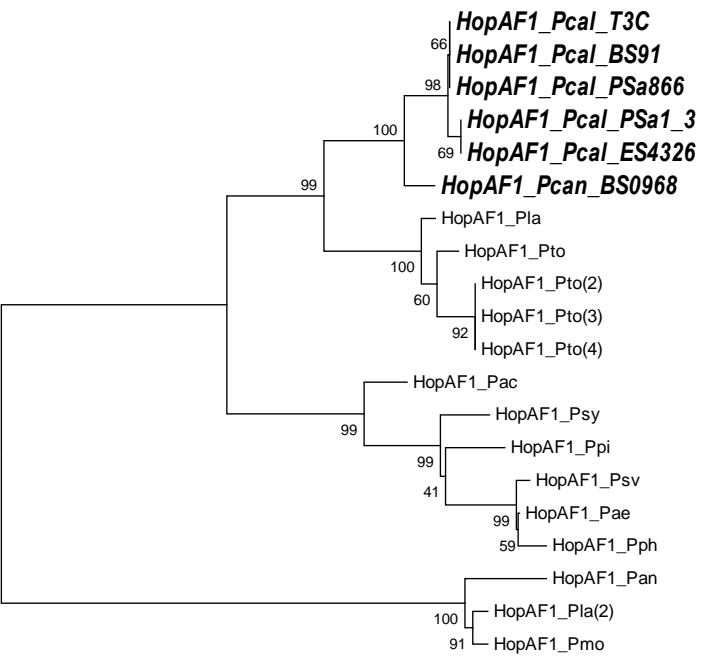

0.02

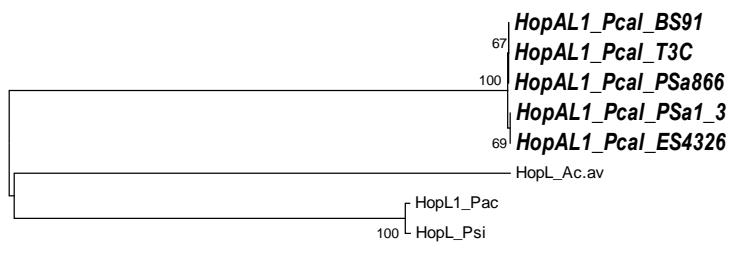

0.1

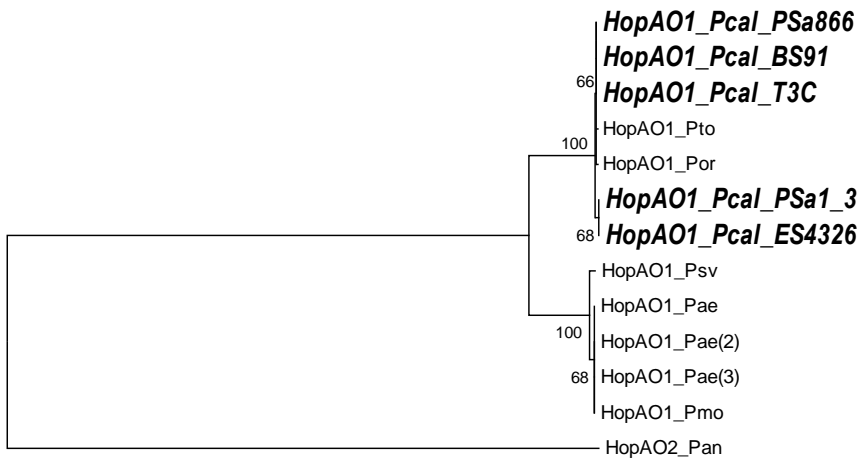

0.05

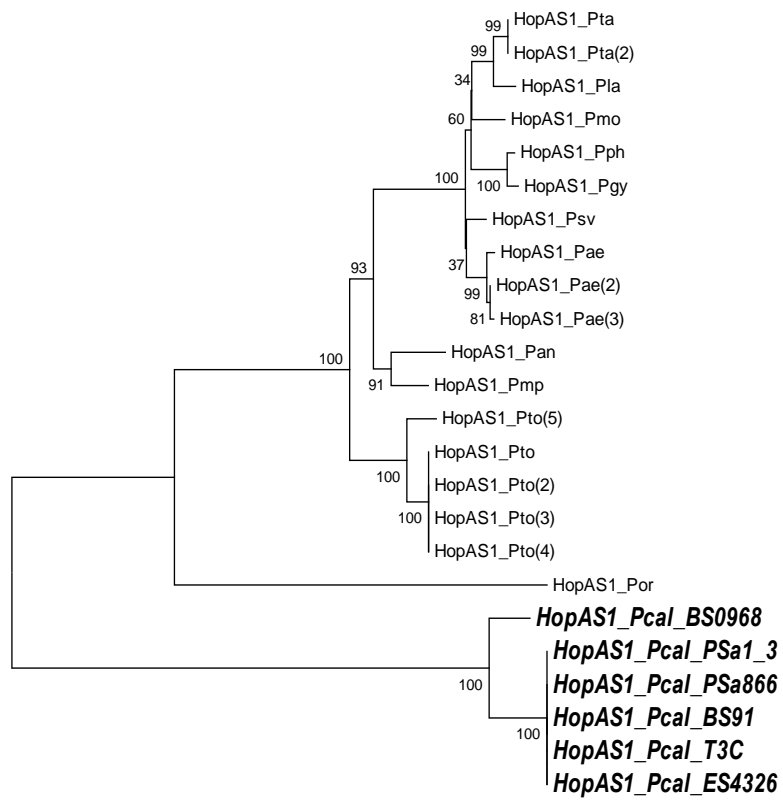

0.02

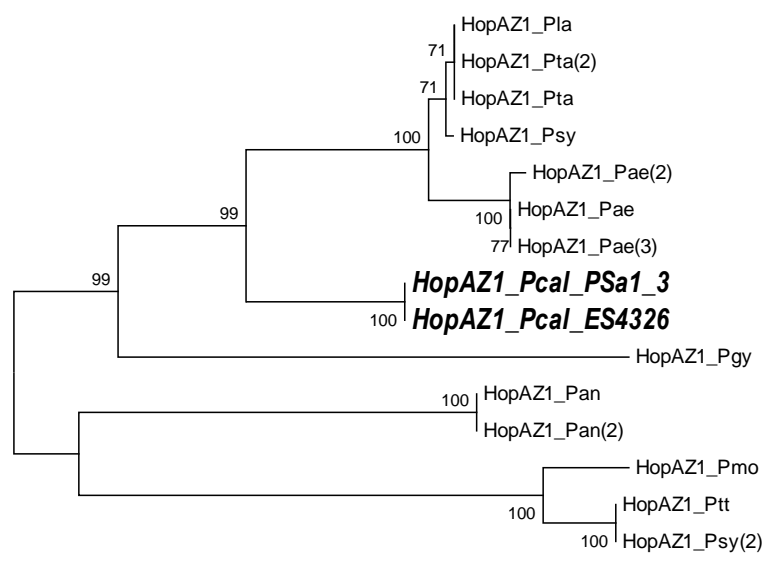

0.05

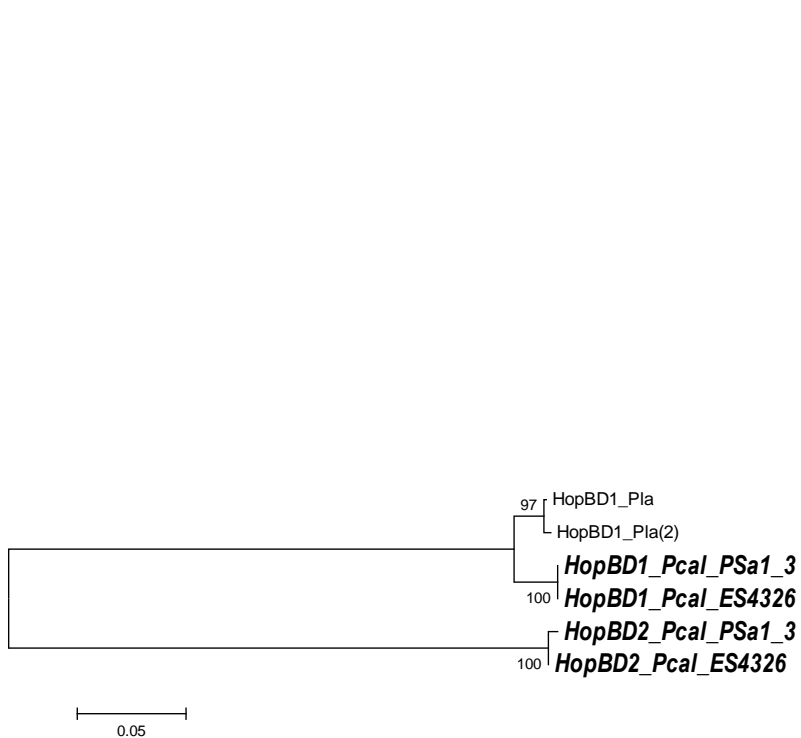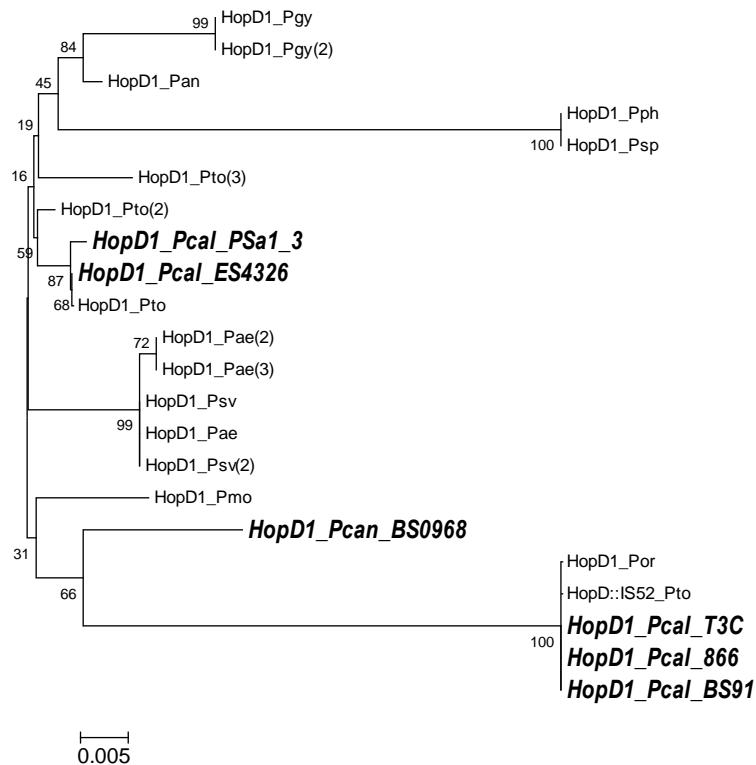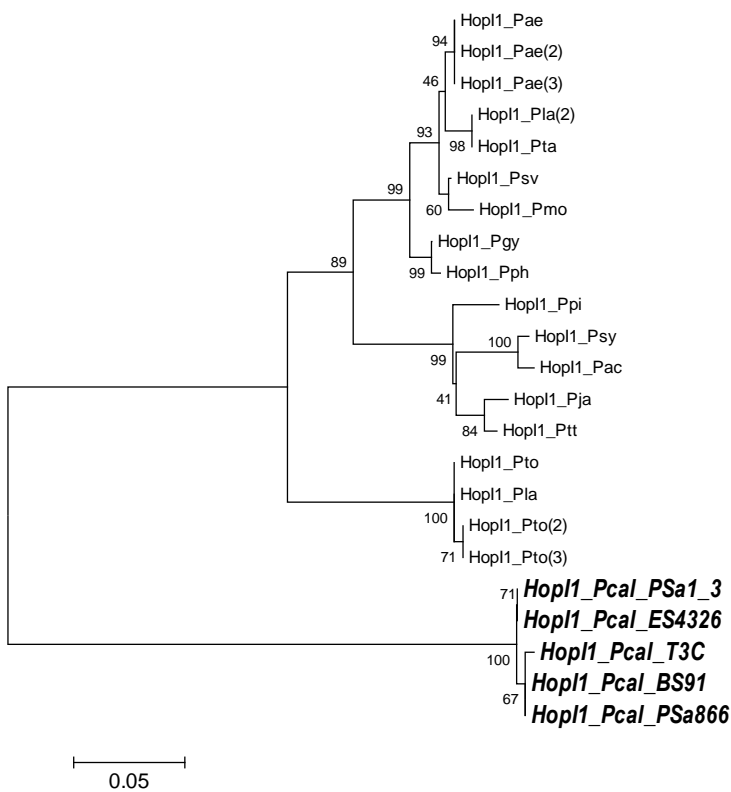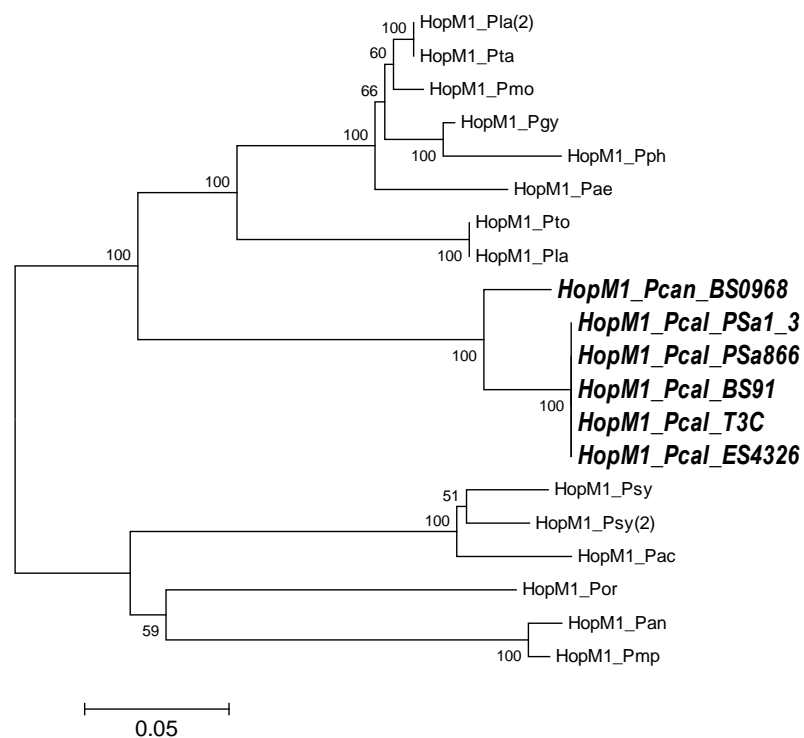

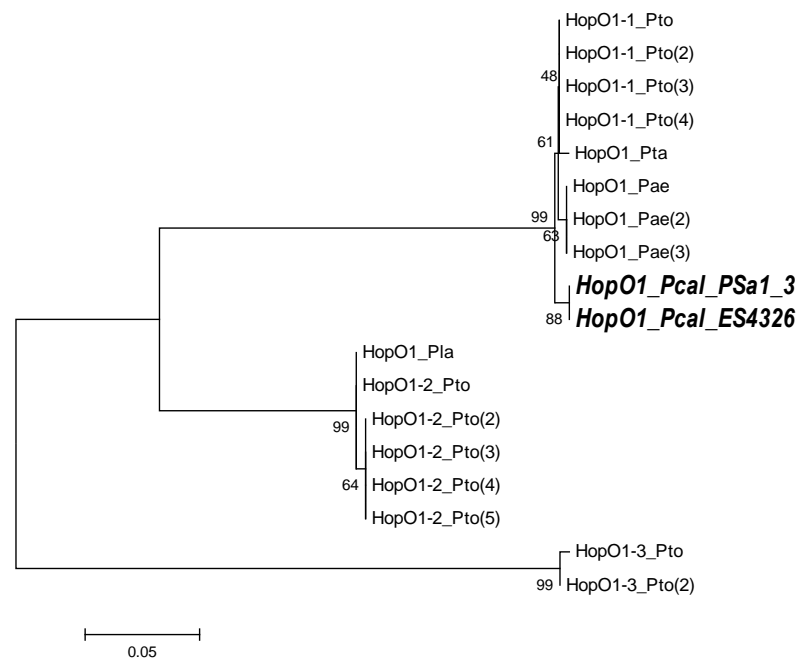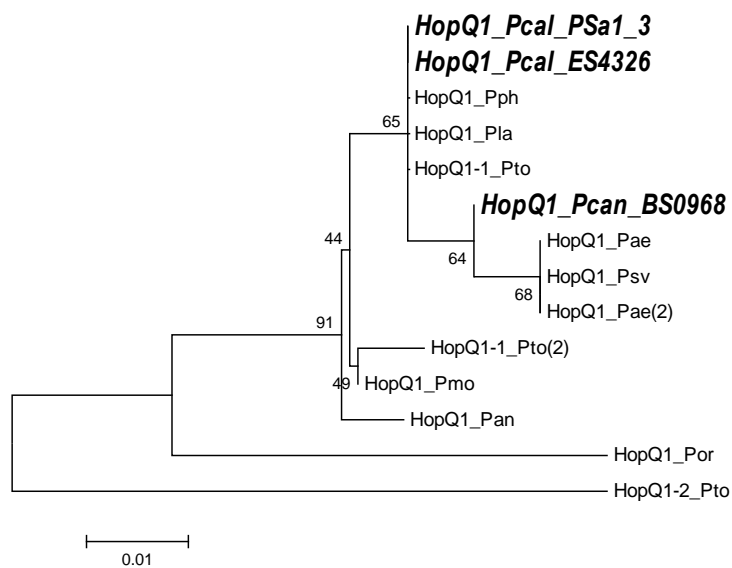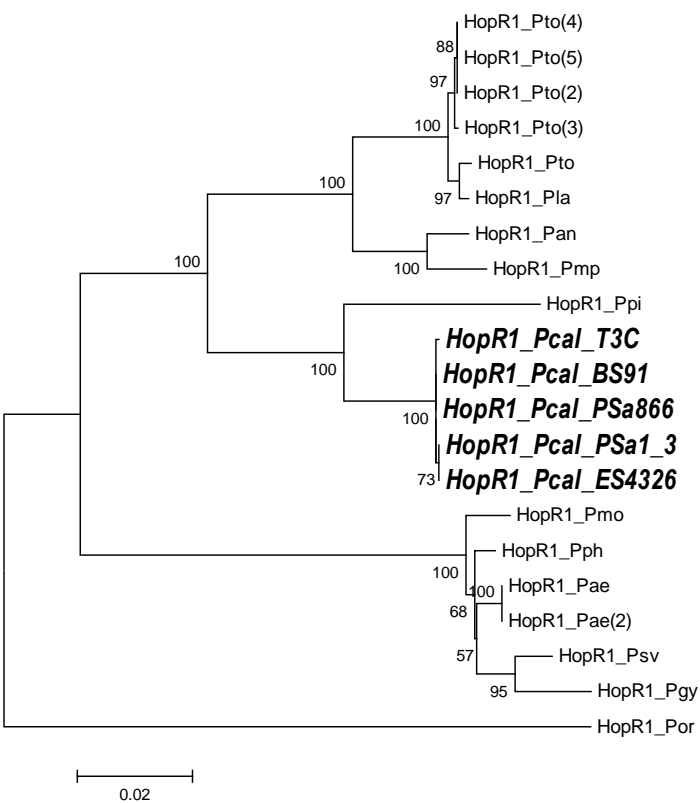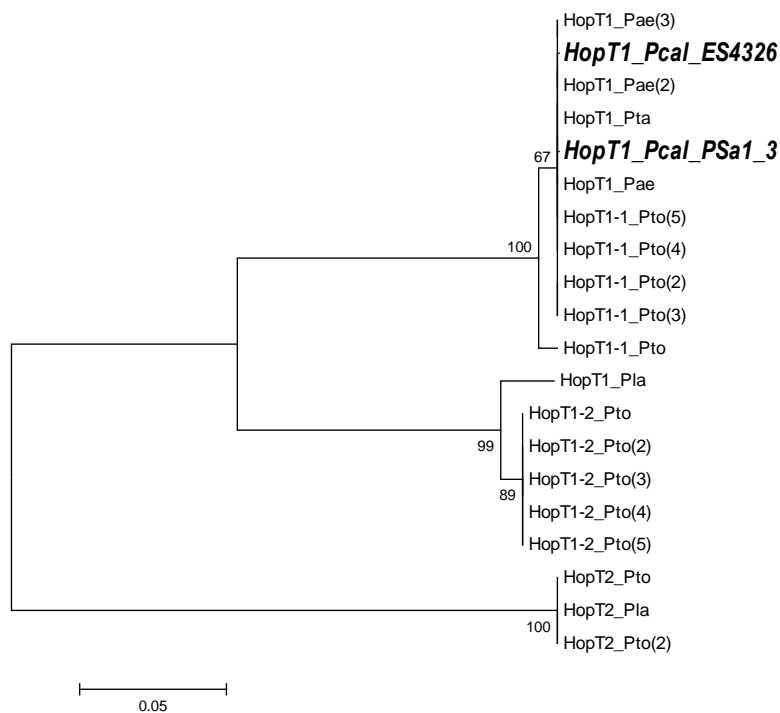

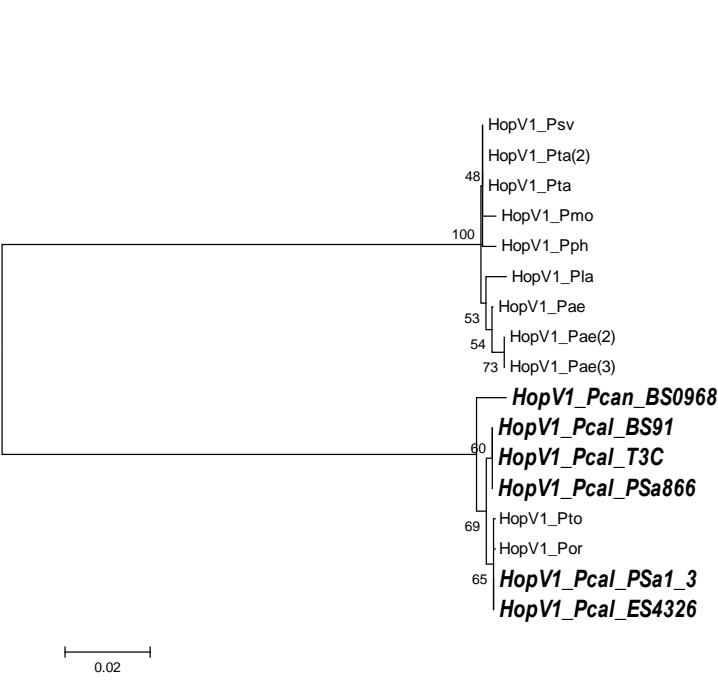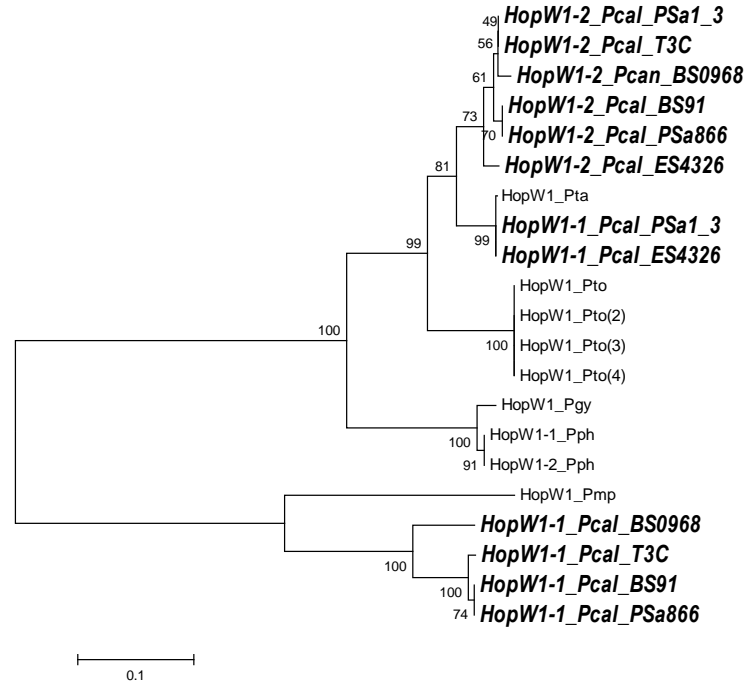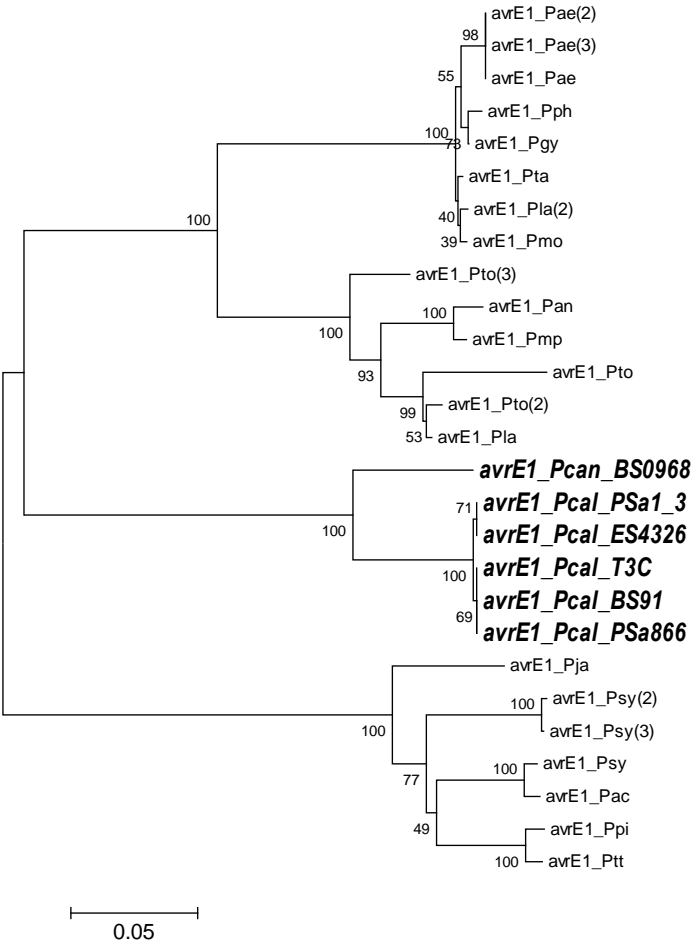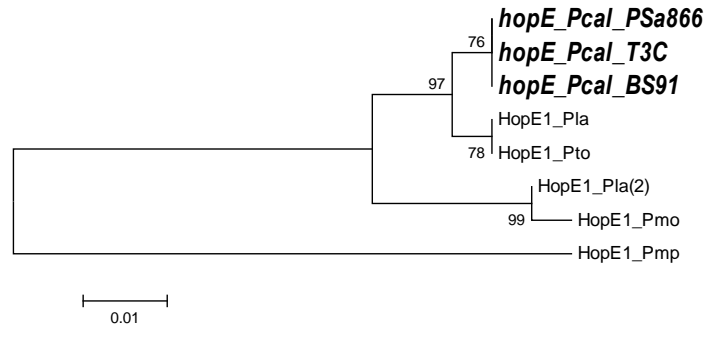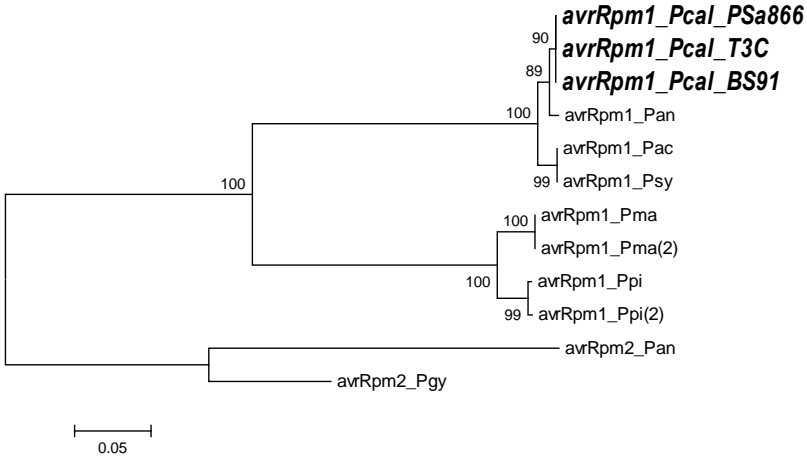

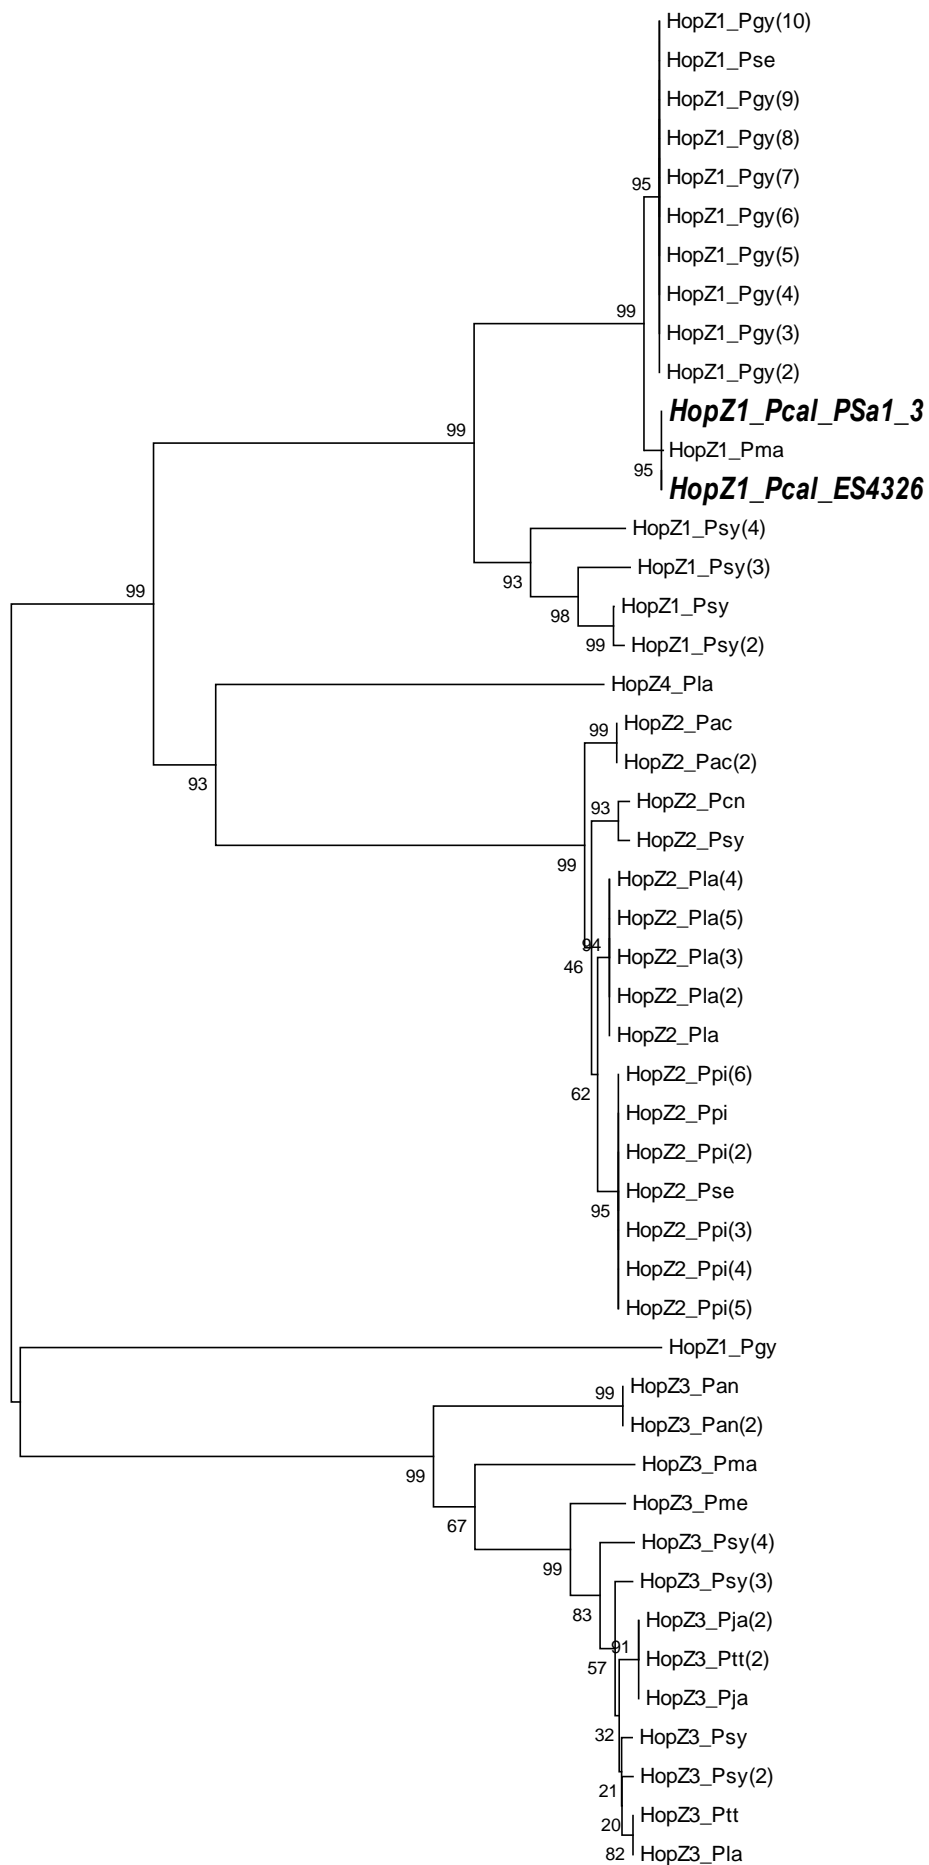

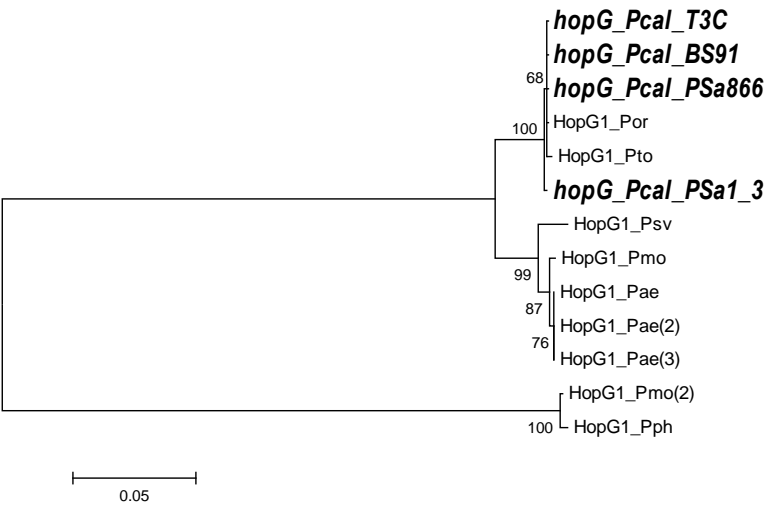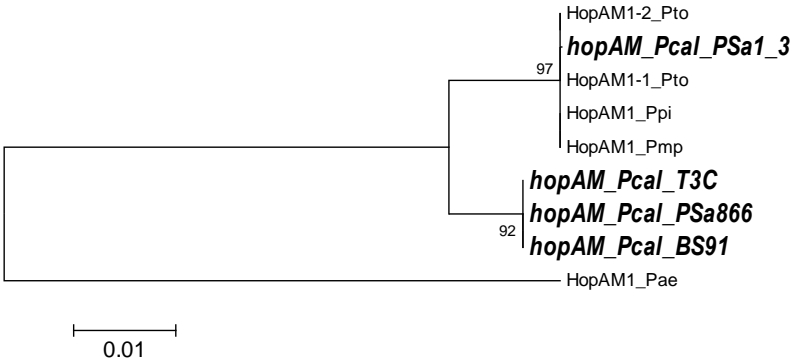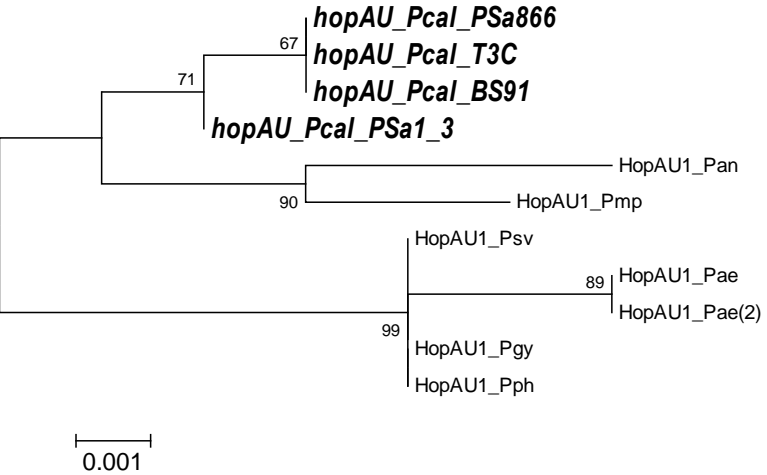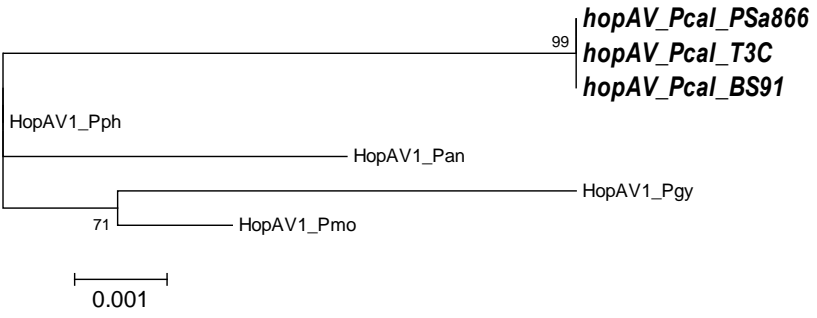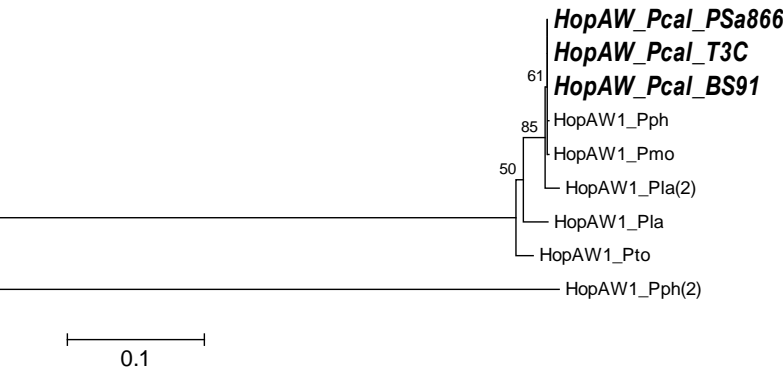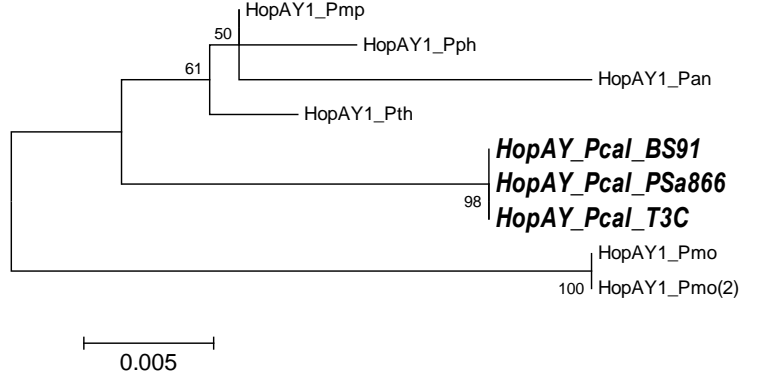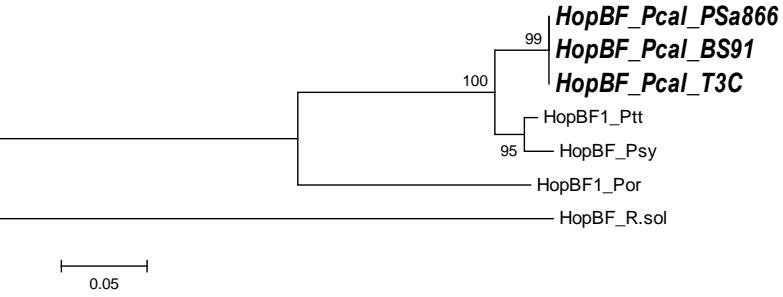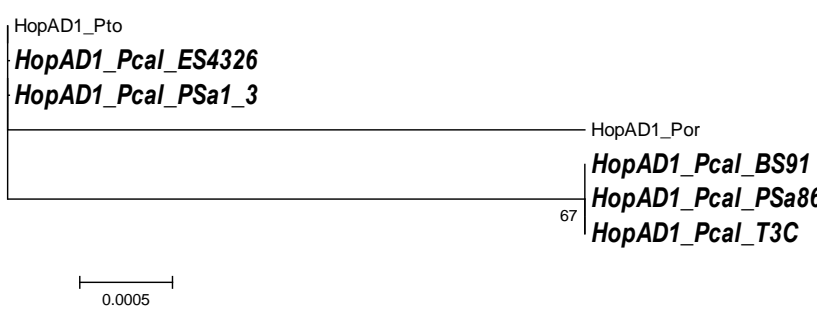

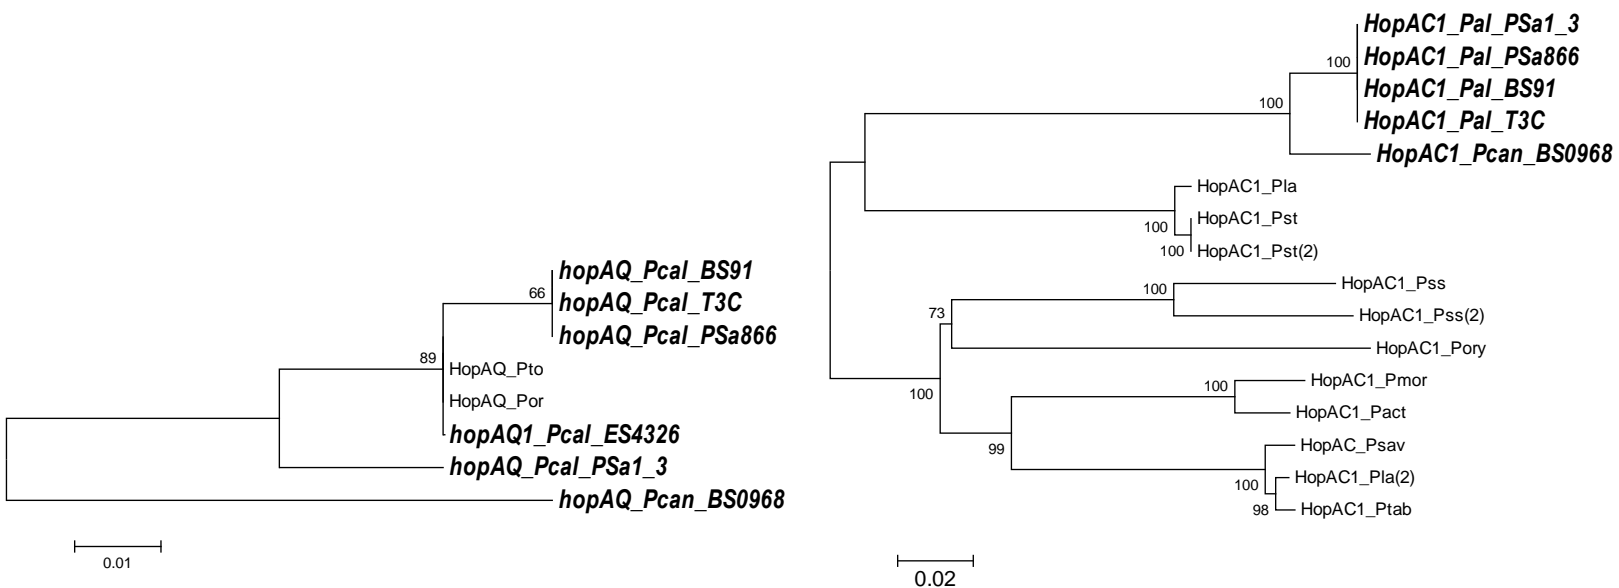

Figure S4

Supplement: Supplementary file 1 [file 1 › Figure_S4.pdf]

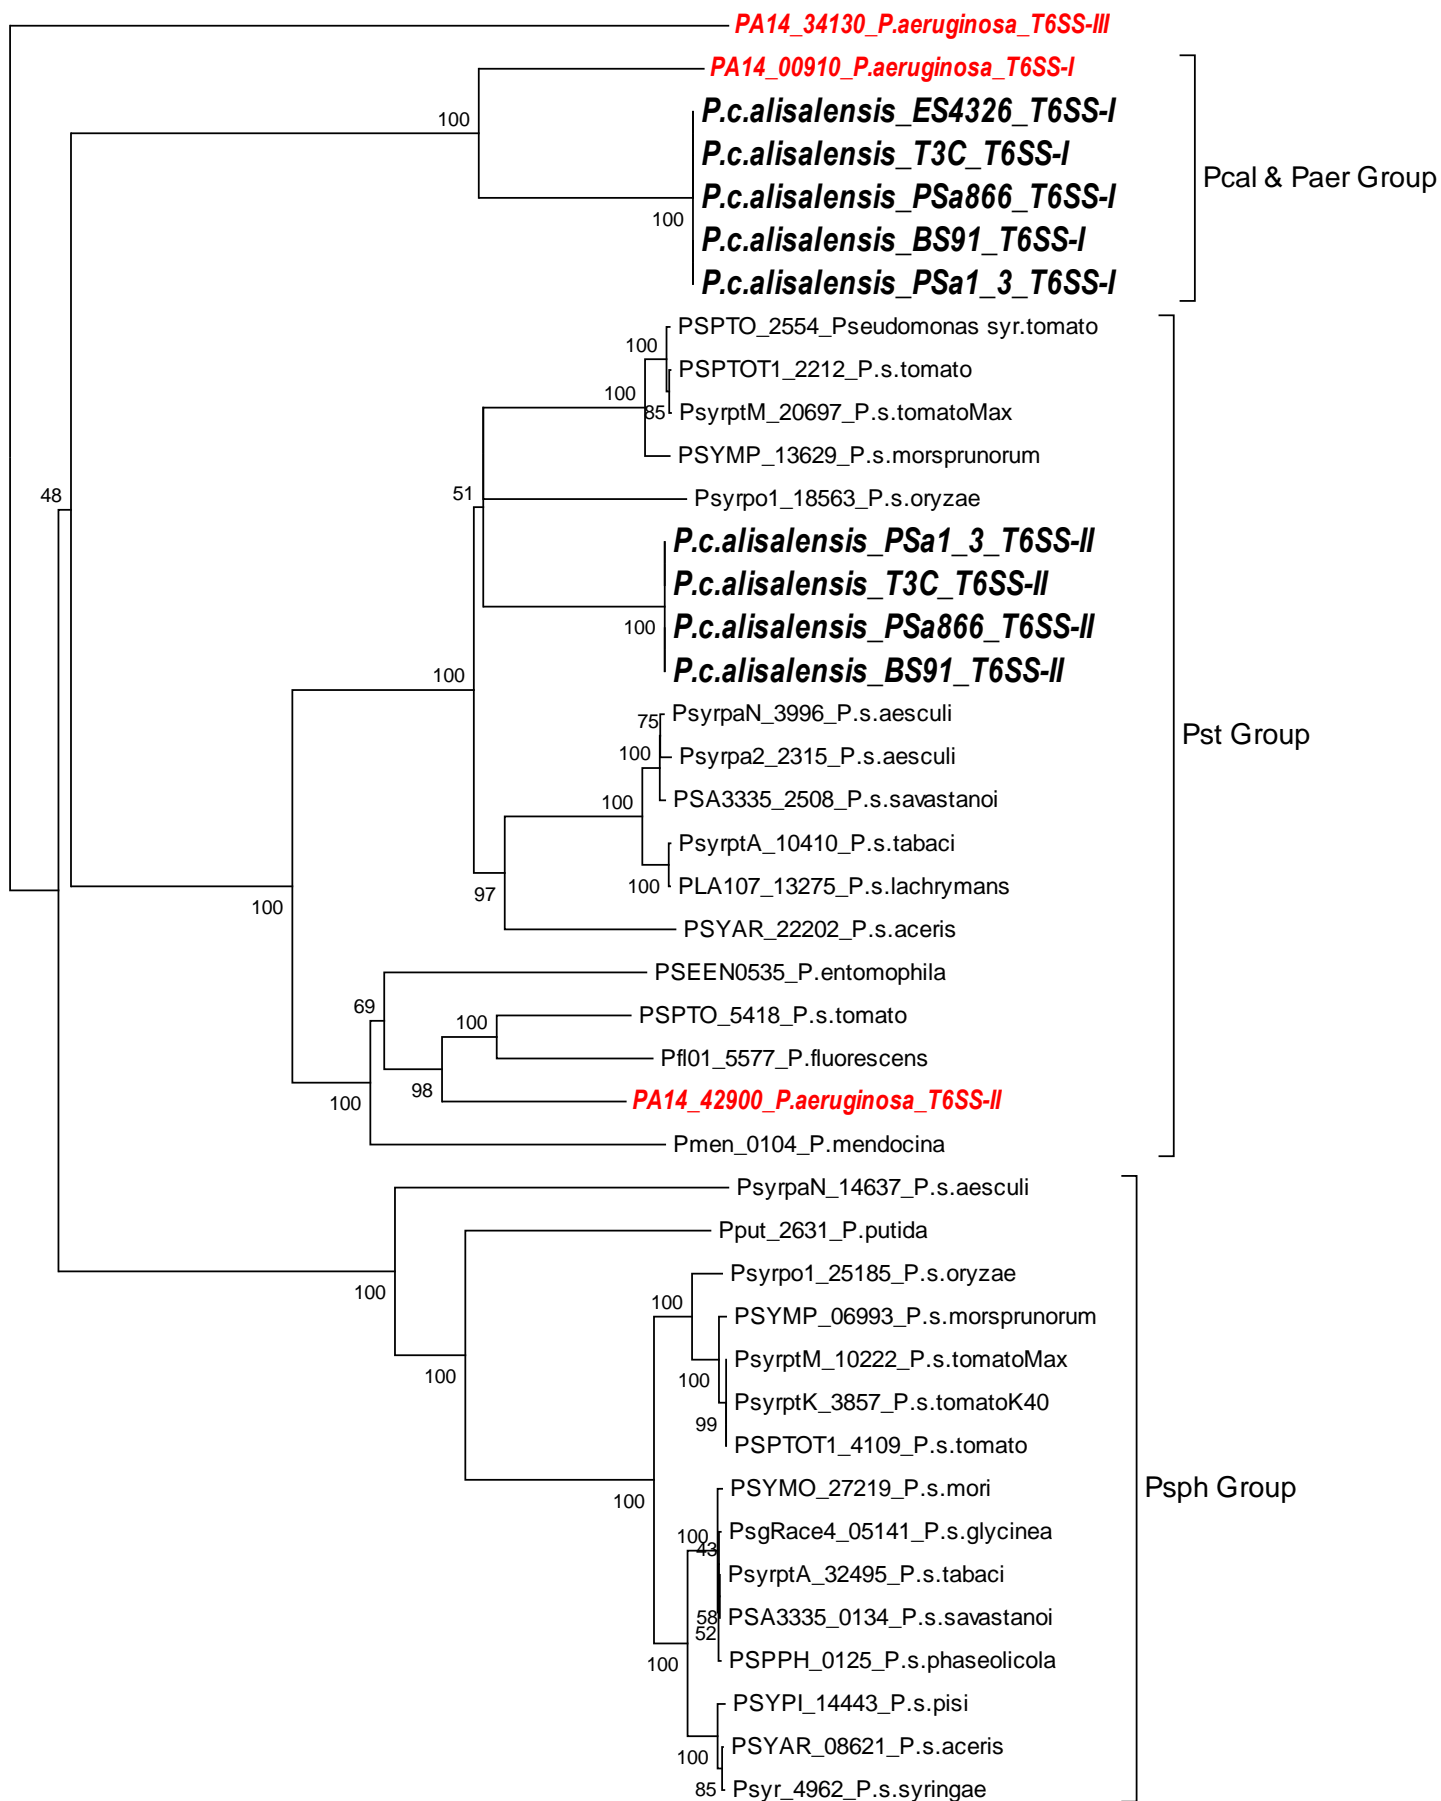

Figure S5

Supplement: Supplementary file 1 [file 1 › Figure_S5.pdf]

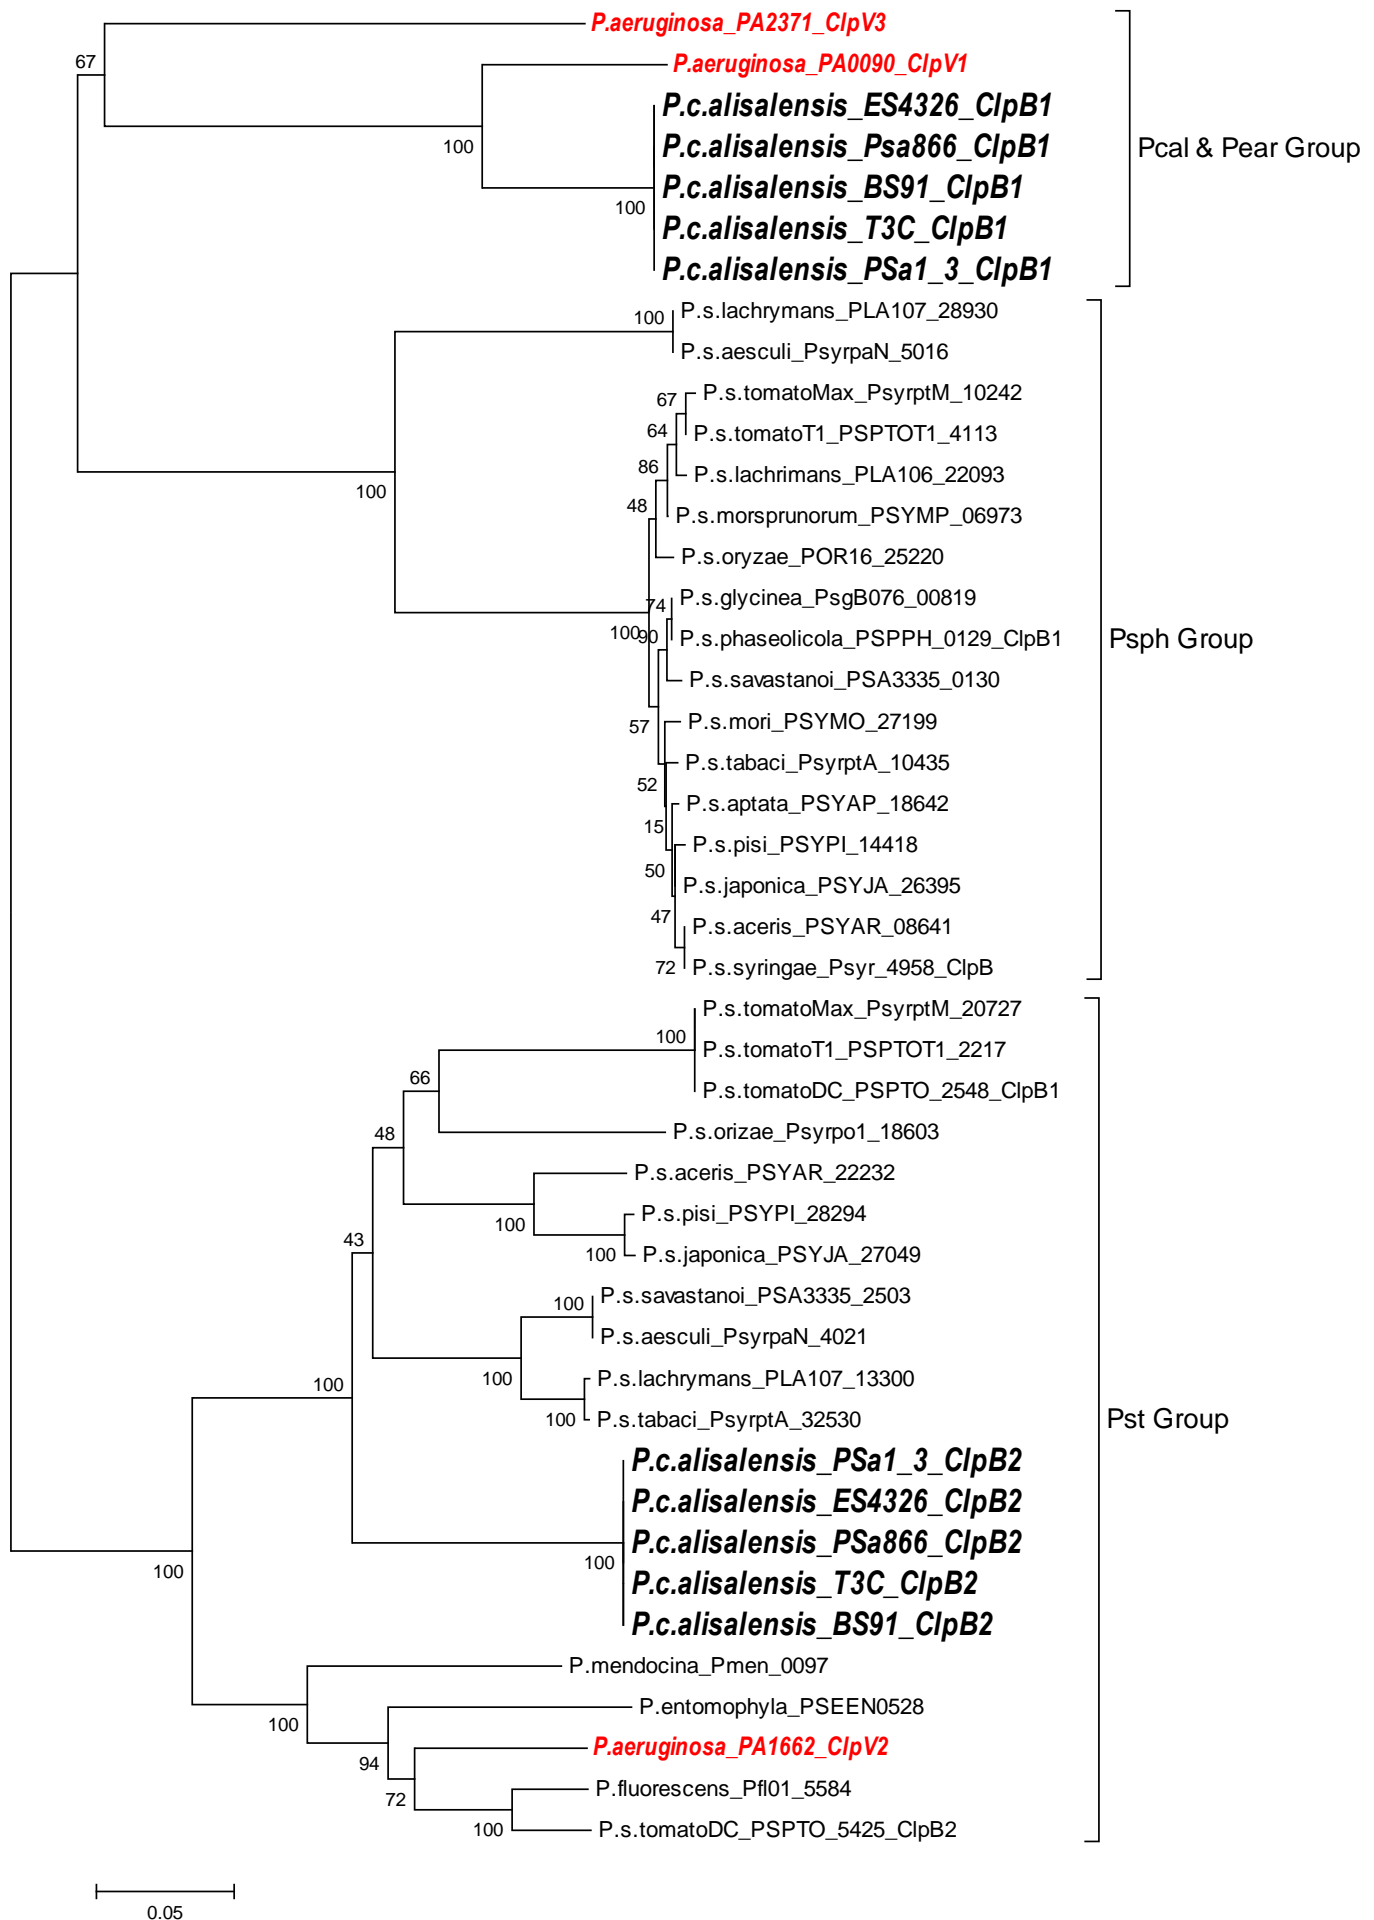

Figure S6

Supplement: Supplementary file 1 [file 1 › Figure_S6.pdf]
